# Supplementary material for: A simple method for the synthesis of N-difluoromethylated pyridines and 4-pyridones/quinolones by using BrCF2COOEt as the difluoromethylation reagent
Source: Royal Society of Chemistry journal article supplement (doi:10.1039/d0ra06322c), 2020-01-01
Supplement: d0ra06322c1.pdf [file d0ra06322c1.pdf]

## SUPPORTING INFORMATION

### **A simple method for the synthesis of N-difluoromethylated pyridines and 4-pyridones/quinolones by using BrCF<sub>2</sub>COOEt as the difluoromethylation reagent.**

Albert Gandioso,<sup>‡</sup> Mohamed El Fakiri,<sup>‡</sup> Anna Rovira<sup>‡</sup> and Vicente Marchán\*

Departament de Química Inorgànica i Orgànica, Secció de Química Orgànica, IBUB,  
Universitat de Barcelona, Martí i Franquès 1-11, E-08028 Barcelona (Spain).

E-mail: [vmarchan@ub.edu](mailto:vmarchan@ub.edu)

<sup>‡</sup>These authors contributed equally to this work.

## Table of contents

|                                                                                                                                                                 |     |
|-----------------------------------------------------------------------------------------------------------------------------------------------------------------|-----|
| 1.- Materials and Methods                                                                                                                                       | S3  |
| 2.- Synthesis of <i>N</i> -difluoromethylated pyridine derivatives and compound <b>9a</b>                                                                       | S4  |
| 3.- Synthesis of <i>N</i> -difluoromethylated 4-pyridone/quinolone derivatives                                                                                  | S7  |
| 4.- UV-HPLC-MS analysis of the <i>N</i> -difluoromethylation reaction of DMAP in ACN                                                                            | S8  |
| Figures S1-S2 and Table S1                                                                                                                                      |     |
| 5.- Capillary electrophoresis analysis of the <i>N</i> -difluoromethylation reaction of DMAP                                                                    | S10 |
| Figure S3-S4                                                                                                                                                    |     |
| 6.- <sup>1</sup> H and <sup>19</sup> F NMR analysis of the <i>N</i> -difluoromethylation reaction of DMAP<br>in CD <sub>3</sub> CN/D <sub>2</sub> O 98:2 (v/v). | S12 |
| Figures S5-S7 and Table S2                                                                                                                                      |     |
| 7.- Stability of compound <b>2b</b> in CD <sub>3</sub> CN by <sup>1</sup> H NMR                                                                                 | S15 |
| Figure S8                                                                                                                                                       |     |
| 8.- <sup>1</sup> H and <sup>19</sup> F NMR analysis of the <i>N</i> -difluoromethylation reaction of <b>4-6</b>                                                 | S16 |
| Figures S9-S11                                                                                                                                                  |     |
| 9.- HPLC analysis of fluorophores <b>8b</b> and <b>9a-9b</b>                                                                                                    | S19 |
| Figures S12-S14                                                                                                                                                 |     |
| 10.- HPLC-MS analysis of the <i>N</i> -difluoromethylation reaction of <b>10-11</b>                                                                             | S20 |
| Figures S15-S16                                                                                                                                                 |     |
| 11.- <sup>1</sup> H, <sup>13</sup> C and <sup>19</sup> F NMR spectra and HR ESI-MS of the compounds                                                             | S21 |
| Figures S17-S36                                                                                                                                                 |     |

## 1.- Materials and Methods

Unless otherwise stated, common chemicals and solvents (HPLC grade or reagent grade quality) were purchased from commercial sources and used without further purification. Aluminium plates coated with a 0.2 mm thick layer of silica gel 60 F<sub>254</sub> were used for thin-layer chromatography analyses (TLC), whereas flash column chromatography purification was carried out using silica gel 60 (230-400 mesh). Microwave reactions were performed in a Biotage Initiator+ Microwave System at the stated conditions. Reversed-phase high-performance liquid chromatography (HPLC) analyses were carried out on a Jupiter Proteo C<sub>18</sub> column (250x4.6 mm, 90 Å 4 µm, flow rate: 1 mL/min) using linear gradients of 0.1% formic acid in H<sub>2</sub>O (A) and 0.1% formic acid in ACN (B). Capillary electrophoresis analyses were carried out on a Hewlett Packard G1600AX-3D Capillary Electrophoresis instrument using a borate buffer solution (pH=9) as an electrolyte. Detection was performed by an UV/Vis diode-array detector operating between 190 and 600 nm. NMR spectra were recorded at 25 °C in a 400 MHz spectrometer using the deuterated solvent as an internal deuterium lock. The residual protic signal of chloroform or DMSO was used as a reference in <sup>1</sup>H and <sup>13</sup>C NMR spectra recorded in CDCl<sub>3</sub> or DMSO-*d*<sub>6</sub>, respectively. Chemical shifts are reported in part per million (ppm) in the δ scale, coupling constants in Hz and multiplicity as follows: s (singlet), d (doublet), t (triplet), q (quartet), qt (quintuplet), m (multiplet), dd (doublet of doublets), tt (triplet of triplets), td (triplet of doublets), etc. IR spectra (Attenuated Total Reflectance, ATR) were recorded on a Nicolet 6700 FT-IR ThermoScientific spectrometer and only the more representative frequencies (ν) are reported in cm<sup>-1</sup>. Electrospray ionization mass spectra (ESI-MS) were recorded on an instrument equipped with single quadrupole detector coupled to an HPLC, and high-resolution (HR) ESI-MS on a LC/MS-TOF instrument.

## 2.- Synthesis of *N*-difluoromethylated pyridine derivatives and compound **9a**

### 2.1. *N*-Difluoromethylation general procedure

In a typical experiment, 100 mg of the pyridine derivative were dissolved in a 1:1 (v/v) mixture of ACN (HPLC quality) and THF (previously eluted through basic aluminium oxide for chromatography, Brockmann I type, 50-200  $\mu\text{m}$ , 60  $\text{\AA}$ ) (20 mL). Then, 5 mol equivalents of ethyl bromodifluoroacetate (**1**) were added to the solution and left to react at 60°C for 24 h under continuous stirring.

#### 2.1.1. Synthesis of 1-difluoromethyl-4-dimethylaminopyridinium bromide (**3**)

DMAP (100 mg, 0.82 mmol) was reacted with **1** (0.54 mL, 4.1 mmol) in a 1:1 (v/v) mixture of neutralized THF and ACN (20 mL) at 60°C for 24 h following the general procedure. After removal of the solvent under reduced pressure and precipitation with cold diethyl ether (10 mL), the expected compound was obtained as a yellowish solid (0.22 g, 92% yield).

Characterization: Yellowish solid.  $^1\text{H}$  NMR (400 MHz,  $\text{CDCl}_3$ ):  $\delta$  (ppm) 8.88 (2H, d,  $J = 8$  Hz), 8.54 (1H, t,  $J = 58$  Hz), 7.13 (2H, d,  $J = 8$  Hz), 3.41 (6H, s).  $^{13}\text{C}\{^1\text{H}\}$  NMR (101 MHz,  $\text{CDCl}_3$ )  $\delta$  (ppm) 158.2, 137.9, 111.3 (t,  $J = 262$  Hz), 108.3, 41.5.  $^{19}\text{F}$  NMR (376 MHz,  $\text{CDCl}_3$ )  $\delta$  (ppm) -95.4 (2F, d,  $J = 58$  Hz). HRMS (ESI): calc.  $m/z$  for  $\text{C}_8\text{H}_{11}\text{F}_2\text{N}_2^+$   $[\text{M}]^+$  173.0885; found 173.0886. HPLC:  $R_t = 7.7$  min (analytical gradient: 0 to 25 % of B in 30 min; A: 0.1 % formic acid in  $\text{H}_2\text{O}$ , B: 0.1 % formic acid in ACN).

#### 2.1.2. Synthesis of 1-(carboxydifluoromethyl)-4-(dimethylamino)pyridinium bromide (**2b**)

Following the general procedure, 120 mg of DMAP were dissolved in 20 mL of ACN (HPLC grade) and 5 mol equivalents of **1** were added. After stirring for 24 h at 60°C, the solvent was removed under reduced pressure and an aliquot of the crude was purified by analytical reversed-phase HPLC. After lyophilisation, compound **2b** was obtained as a yellowish solid.

Characterization:  $^1\text{H}$  NMR (400 MHz,  $\text{CD}_3\text{CN}$ )  $\delta$  (ppm) 8.26 (2H, d,  $J = 8.0$  Hz), 6.89 (2H, d,  $J = 8.0$  Hz), 3.23 (6H, s).  $^{13}\text{C}\{^1\text{H}\}$  NMR (101 MHz,  $\text{CD}_3\text{CN}$ )  $\delta$  (ppm) 159.2 (t,  $J = 26$  Hz), 158.5, 137.9 (t,  $J = 4.0$  Hz), 114.0 (t,  $J = 286$  Hz), 108.0, 41.1.  $^{19}\text{F}$  NMR (376 MHz,  $\text{CD}_3\text{CN}$ )  $\delta$  (ppm) -90.3 (s, 2F). IR (ATR)  $\nu$  ( $\text{cm}^{-1}$ ) 3370, 3076, 2914, 1688, 1650, 1581, 1525, 1413, 1372, 1356, 1167, 1106, 866, 829, 796, 691, 658, 571. LRMS: calc.  $m/z$  for  $\text{C}_9\text{H}_{11}\text{F}_2\text{N}_2\text{O}_2^+$   $[\text{M}]^+$  217.08; found 216.99. HRMS (ESI): calc.  $m/z$  for  $\text{C}_9\text{H}_{11}\text{F}_2\text{N}_2\text{O}_2^+$   $[\text{M}]^+$  217.0783; found 217.0787. HPLC:  $R_t = 12.9$  min (analytical gradient: 0 to 40 % of B in 30 min; A: 0.1 % formic acid in  $\text{H}_2\text{O}$ , B: 0.1 % formic acid in ACN).

### 2.1.3. Synthesis of 1-(difluoromethyl)pyridinium bromide (4a)

Following the general procedure, 10 mg of pyridine were dissolved in 2 mL of ACN/THF 1:1 and 5 mol equivalents of **1** were added. After stirring for 24 h at 60°C, the solvent was removed under reduced pressure. The reaction crude was dissolved in DMSO-*d*<sub>6</sub> and <sup>1</sup>H and <sup>19</sup>F NMR spectra were recorded to assess the conversion yield and characterize **4a**

Characterization: <sup>1</sup>H NMR (400 MHz, DMSO-*d*<sub>6</sub>) δ (ppm) 9.48 (2H, m), 8.95 (1H, tt, *J* = 8, 1.2 Hz), 8.40 (2H, t, *J* = 7.2 Hz), 8.31 (1H, t, *J* = 58 Hz). <sup>19</sup>F NMR (376 MHz, DMSO-*d*<sub>6</sub>) δ (ppm) -96.4 (d, 2F, *J* = 58 Hz). LRMS: calc. *m/z* for C<sub>6</sub>H<sub>6</sub>F<sub>2</sub>N<sup>+</sup> [M]<sup>+</sup> 130.05; found 129.9.

### 2.1.4. Synthesis of 1-(difluoromethyl)-2-methylpyridinium bromide (5a)

Following the same procedure as for the synthesis of **4a**, <sup>1</sup>H and <sup>19</sup>F NMR analyses were carried out with the totality of the crude after 24 h.

Characterization: <sup>1</sup>H NMR (400 MHz, DMSO-*d*<sub>6</sub>) δ (ppm) 9.36 (1H, d, *J* = 7.6, 1.4 Hz), 8.78 (1H, td, *J* = 7.6, 1.4 Hz), 8.41 (1H, t, *J* = 57 Hz), 8.23 (1H, d, *J* = 7.6 Hz), 8.18 (1H, t, *J* = 7.6 Hz), 2.96 (3H, s). <sup>19</sup>F NMR (376 MHz, DMSO-*d*<sub>6</sub>) δ (ppm) -99.8 (2F, d, *J* = 57 Hz). LRMS: calc. *m/z* for C<sub>7</sub>H<sub>8</sub>F<sub>2</sub>N<sup>+</sup> [M]<sup>+</sup> 144.06; found 143.9.

### 2.1.5. Synthesis of 1-(difluoromethyl)-2,6-dimethylpyridinium bromide (6a)

Following the same procedure as for the synthesis of **4a**, <sup>1</sup>H and <sup>19</sup>F NMR analyses were carried out with the totality of the crude after 24 h.

Characterization: <sup>1</sup>H NMR (400 MHz, DMSO-*d*<sub>6</sub>) δ (ppm) 8.63 (1H, t, *J* = 8 Hz), 8.46 (t, 1H, *J* = 58 Hz), 8.05 (2H, d, *J* = 8 Hz), 2.08 (6H, s). <sup>19</sup>F NMR (376 MHz, DMSO-*d*<sub>6</sub>) δ (ppm) -98.5 (2F, d, *J* = 58 Hz). LRMS: calc. *m/z* for C<sub>8</sub>H<sub>10</sub>F<sub>2</sub>N<sup>+</sup> [M]<sup>+</sup> 158.08; found 157.8.

### 2.1.6. Synthesis of 2-(cyano(1-difluoromethyl(4-pyridin-1-ium))methylene)-7-(*N,N*-diethylamino)-4-methyl-coumarin bromide (8b).

Following the general procedure, 2-(cyano(4-pyridine)methylene)-7-(*N,N*-diethylamino)-4-methyl-coumarin (**8**) (40 mg, 0.12 mmol) was reacted with 30 mol equiv. of **1** (0.32 mL, 3.6 mmol; the reagent addition was divided into three portions at *t* = 0, 1 h and 4 h) in a 1:1 (v/v) mixture of neutralized THF and ACN (20 mL) at 60°C for 24 h. After evaporation under reduced pressure, compound **8b** was purified by column chromatography (silica gel, 0-8% MeOH in DCM) to give 46 mg of a dark blue solid (yield 83%).

Characterization: TLC: R<sub>f</sub> (DCM/MeOH 9:1) 0.67. <sup>1</sup>H NMR (400 MHz, DMSO-*d*<sub>6</sub>) δ (ppm) 8.75 (2H, d, *J* = 8.0 Hz), 8.13 (2H, br d, *J* = 8.0 Hz), 8.03 (1H, t, *J* = 58 Hz), 7.85 (1H, d, *J* = 9.2 Hz), 7.12 (1H, dd, *J* = 9.2, 2.4 Hz), 7.08 (2H, m), 3.61 (4H, q, *J* = 7.2 Hz), 2.63 (3H, s),

1.20 (6H, t,  $J = 7.2$  Hz).  $^{13}\text{C}\{^1\text{H}\}$  NMR (101 MHz, DMSO- $d_6$ )  $\delta$  (ppm) 167.2, 156.3, 155.6, 152.9, 152.7, 137.5, 127.6, 118.9, 117.7, 113.4, 112.2 (t,  $J = 262$  Hz), 111.7, 110.9, 96.1, 79.5, 44.5, 18.7, 12.4.  $^{19}\text{F}$  NMR (376 MHz, DMSO- $d_6$ )  $\delta$  (ppm): -95.9 (2F, d,  $J = 58$  Hz). HRMS (ESI-TOF) ( $m/z$ ):  $[\text{M}]^+$  Calcd for  $\text{C}_{22}\text{H}_{22}\text{F}_2\text{N}_3\text{O}^+$ , 382.1725; found, 382.1727. Analytical HPLC (10–100% B in 30 min, formic acid additive):  $R_t = 14.6$  min.

### 2.1.7. Synthesis of 10-methyl-3,6-bis(dimethylamino)acridin-10-ium triflate (9a)

Acridine orange (200 mg, 0.75 mmol) was reacted with methyl trifluoromethanesulfonate (0.34 mL, 3 mmol) in DCM (100 mL) at room temperature for 24 h. After evaporation under reduced pressure, compound **9a** was purified by column chromatography (silica gel, 0-4% MeOH in DCM) to give 173 mg of an orange solid (yield 54%).

Characterization: TLC:  $R_f$  (DCM/MeOH 9:1) 0.52.  $^1\text{H}$  NMR (400 MHz, DMSO- $d_6$ )  $\delta$  (ppm) 8.84 (1H, s), 7.96 (2H, d,  $J = 9.2$  Hz), 7.30 (2H, dd,  $J = 9.2, 2.0$  Hz), 6.76 (2H, d,  $J = 2.0$  Hz), 4.15 (3H, s), 3.29 (12H, s).  $^{13}\text{C}\{^1\text{H}\}$  NMR (101 MHz, DMSO- $d_6$ )  $\delta$  (ppm) 155.2, 143.0, 142.4, 132.7, 116.3, 114.2, 92.9, 40.3, 35.5. HRMS (ESI-TOF) ( $m/z$ ):  $[\text{M}]^+$  Calcd for  $\text{C}_{18}\text{H}_{22}\text{N}_3$ , 280.1808; found, 280.1814. Analytical HPLC (10–100% B in 30 min, formic acid additive):  $R_t = 13$  min.

### 2.1.8. Synthesis of 10-(difluoromethyl)-3,6-bis(dimethylamino)acridin-10-ium bromide (9b)

Following the general procedure, acridine orange (100 mg, 0.38 mmol) was reacted with 5 mol equiv. of **1** (0.25 mL, 1.9 mmol) in a 1:1 (v/v) mixture of neutralized THF and ACN (20 mL) at 60°C for 24 h. Then, an additional amount of **1** was added (0.25 mL) and the reaction was stirred at 60°C for 24 h. After evaporation under reduced pressure and precipitation from *tert*-butyl methyl ether, compound **9b** was purified by column chromatography (silica gel, 0-5% MeOH in DCM) to give 115 mg of a garnet/burgundy solid (yield 76%).

Characterization: TLC:  $R_f$  (DCM/MeOH 95:5) 0.28.  $^1\text{H}$  NMR (400 MHz, DMSO- $d_6$ )  $\delta$  (ppm) 8.80 (1H, s), 8.64 (1H, t,  $J = 55$  Hz), 7.96 (2H, d,  $J = 9.2$  Hz), 7.29 (2H, dd,  $J = 9.2, 2.2$  Hz), 6.93 (2H, br s), 3.31 (12H, s).  $^{13}\text{C}\{^1\text{H}\}$  NMR (101 MHz, DMSO- $d_6$ )  $\delta$  (ppm) 155.8, 146.2, 140.1, 134.1, 116.1, 114.3, 112.3 (t,  $J = 252$  Hz), 94.4, 40.5.  $^{19}\text{F}$  NMR (376 MHz, DMSO- $d_6$ )  $\delta$  (ppm): -102.0 (2F, d,  $J = 55$  Hz). HRMS (ESI-TOF) ( $m/z$ ):  $[\text{M}]^+$  Calcd for  $\text{C}_{18}\text{H}_{20}\text{F}_2\text{N}_3$ , 316.1620; found, 316.1619. Analytical HPLC (10–100% B in 30 min, formic acid additive):  $R_t = 13.6$  min.

### 3.- Synthesis of *N*-difluoromethylated 4-pyridone/quinolone derivatives

#### 3.1. Synthesis of 1-(difluoromethyl)pyridin-4-one (10b)

The reaction between 4-methoxypyridine (500 mg, 4.58 mmol) and ethyl bromodifluoroacetate (6.05 mL, 45.8 mmol) was carried out following the standard procedure. After stirring at 60°C for 24 h, the solvent was removed under reduced pressure and the product was purified by column chromatography (silica gel, 0-5% MeOH in DCM). The appropriate fractions were collected and the solvents removed in a rotary evaporator to give 365 mg (55 % yield) of a colourless oil.

Characterization: TLC:  $R_f$  (DCM/MeOH 9:1) 0.41.  $^1\text{H}$  NMR (400 MHz,  $\text{CDCl}_3$ )  $\delta$  (ppm) 7.52 (2H, d,  $J = 7.8$  Hz), 6.76 (1H, t,  $J = 59.6$  Hz), 6.44 (2H, d,  $J = 7.8$  Hz).  $^{13}\text{C}\{^1\text{H}\}$  NMR (101 MHz,  $\text{CDCl}_3$ )  $\delta$  (ppm) 179.9, 134.1, 119.2, 112.1 (t,  $J = 255$  Hz).  $^{19}\text{F}$  NMR (376 MHz,  $\text{DMSO}-d_6$ )  $\delta$  (ppm) -92.2 (d, 2F,  $J = 59.6$  Hz). HRMS (ESI): calc.  $m/z$  for  $\text{C}_6\text{H}_6\text{F}_2\text{NO}$   $[\text{M}+\text{H}]^+$  146.0412; found 146.0412. HPLC:  $R_t = 12.4$  min (analytical gradient: 0 to 40 % of B in 30 min; A: 0.1 % formic acid in  $\text{H}_2\text{O}$ , B: 0.1 % formic acid in ACN).

#### 3.2. Synthesis of 1-(difluoromethyl)quinolin-4-one (11a)

The reaction between 4-methoxyquinoline (500 mg, 3.14 mmol) and ethyl bromodifluoroacetate (6.23 mL, 47.1 mmol) was carried out following the standard procedure (60°C, 24 h). Then, an additional amount of ethyl bromodifluoroacetate was added (4.15 mL, 31.4 mmol). After stirring at 60°C for 24 h, the solvent was removed under reduced pressure and the product was purified by column chromatography (silica gel, 0-1% AcOEt in DCM). The appropriate fractions were collected and the solvents removed in a rotary evaporator to give 370 mg (60 % yield) of a white solid.

Characterization: TLC:  $R_f$  (AcOEt) 0.70.  $^1\text{H}$  NMR (400 MHz,  $\text{CDCl}_3$ )  $\delta$  (ppm) 8.41 (1H, d,  $J = 8.4$  Hz), 7.74 (1H, d,  $J = 8.0$  Hz), 7.72-7.62 (2H, m), 7.45 (1H, t,  $J = 7.4$  Hz), 7.24 (1H, t,  $J = 59.5$  Hz), 6.31 (1H, d,  $J = 8.0$  Hz).  $^{13}\text{C}\{^1\text{H}\}$  NMR (101 MHz,  $\text{CDCl}_3$ )  $\delta$  (ppm) 178.6, 137.2, 136.1, 133.0, 127.4, 126.5, 125.2, 115.2 (t,  $J = 3.2$  Hz), 112.3, 111.7 (t,  $J = 255$  Hz).  $^{19}\text{F}$  NMR (376 MHz,  $\text{DMSO}-d_6$ )  $\delta$  (ppm) -95.3 (d, 2F,  $J = 59.5$  Hz). HRMS (ESI): calc.  $m/z$  for  $\text{C}_{10}\text{H}_8\text{F}_2\text{NO}$   $[\text{M}+\text{H}]^+$  196.0574; found 196.0569. HPLC:  $R_t = 15.7$  min (analytical gradient: 0 to 100 % of B in 30 min; A: 0.1 % formic acid in  $\text{H}_2\text{O}$ , B: 0.1 % formic acid in ACN).

#### 4.- UV-HPLC-MS analysis of the N-difluoromethylation reaction of DMAP in ACN.

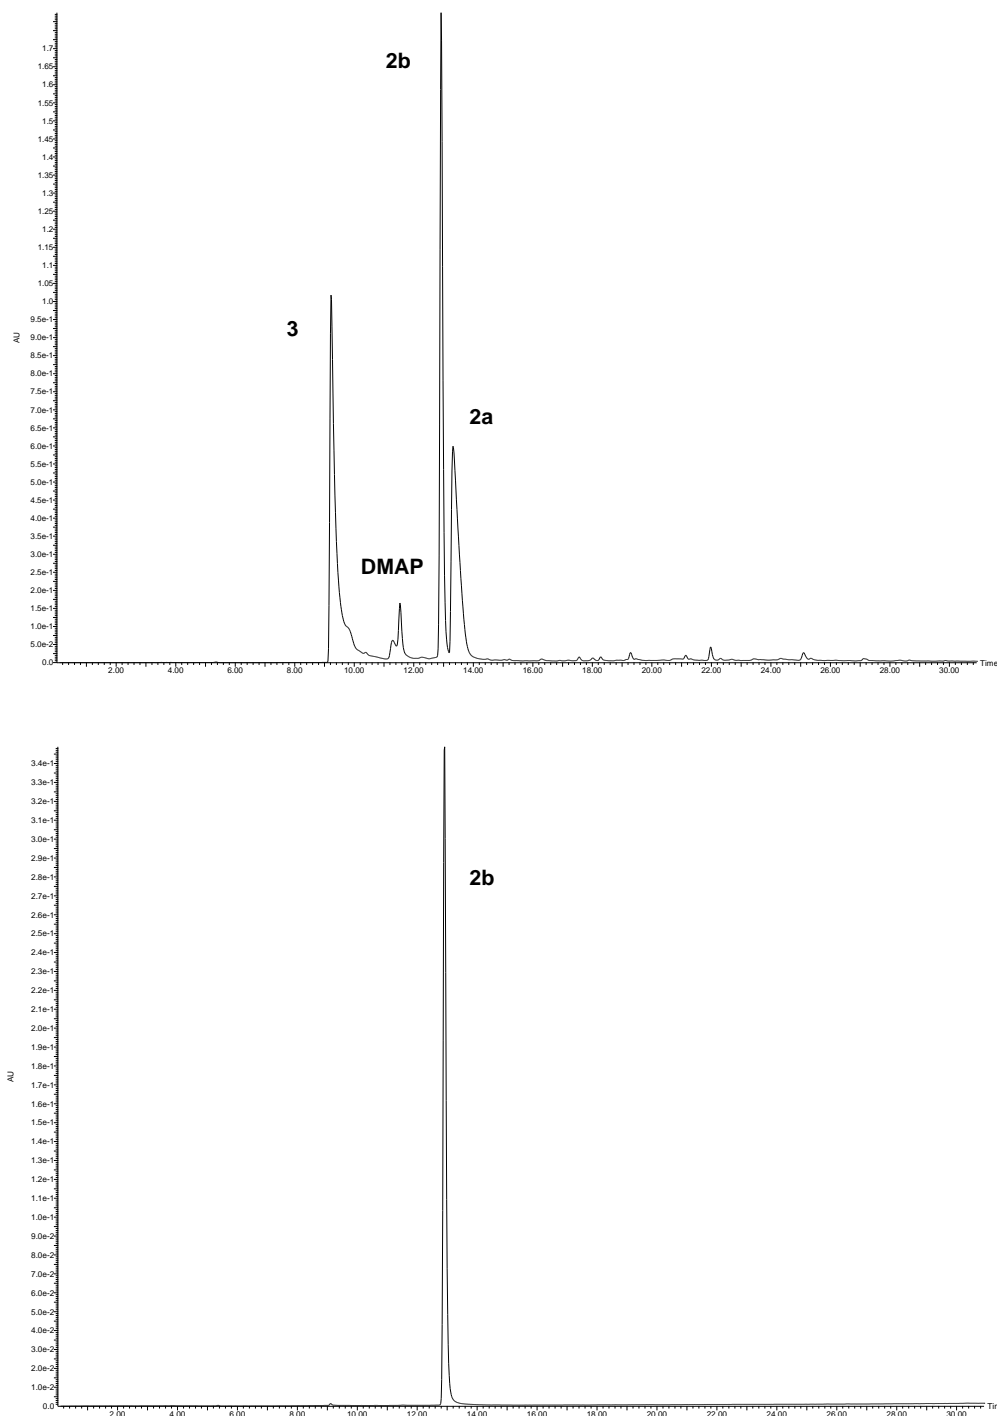

**Figure S1.** UV-HPLC-MS analysis of the N-difluoromethylation reaction of DMAP with **1** in ACN (HPLC quality), crude (top) and pure intermediate **2b** isolated (bottom).



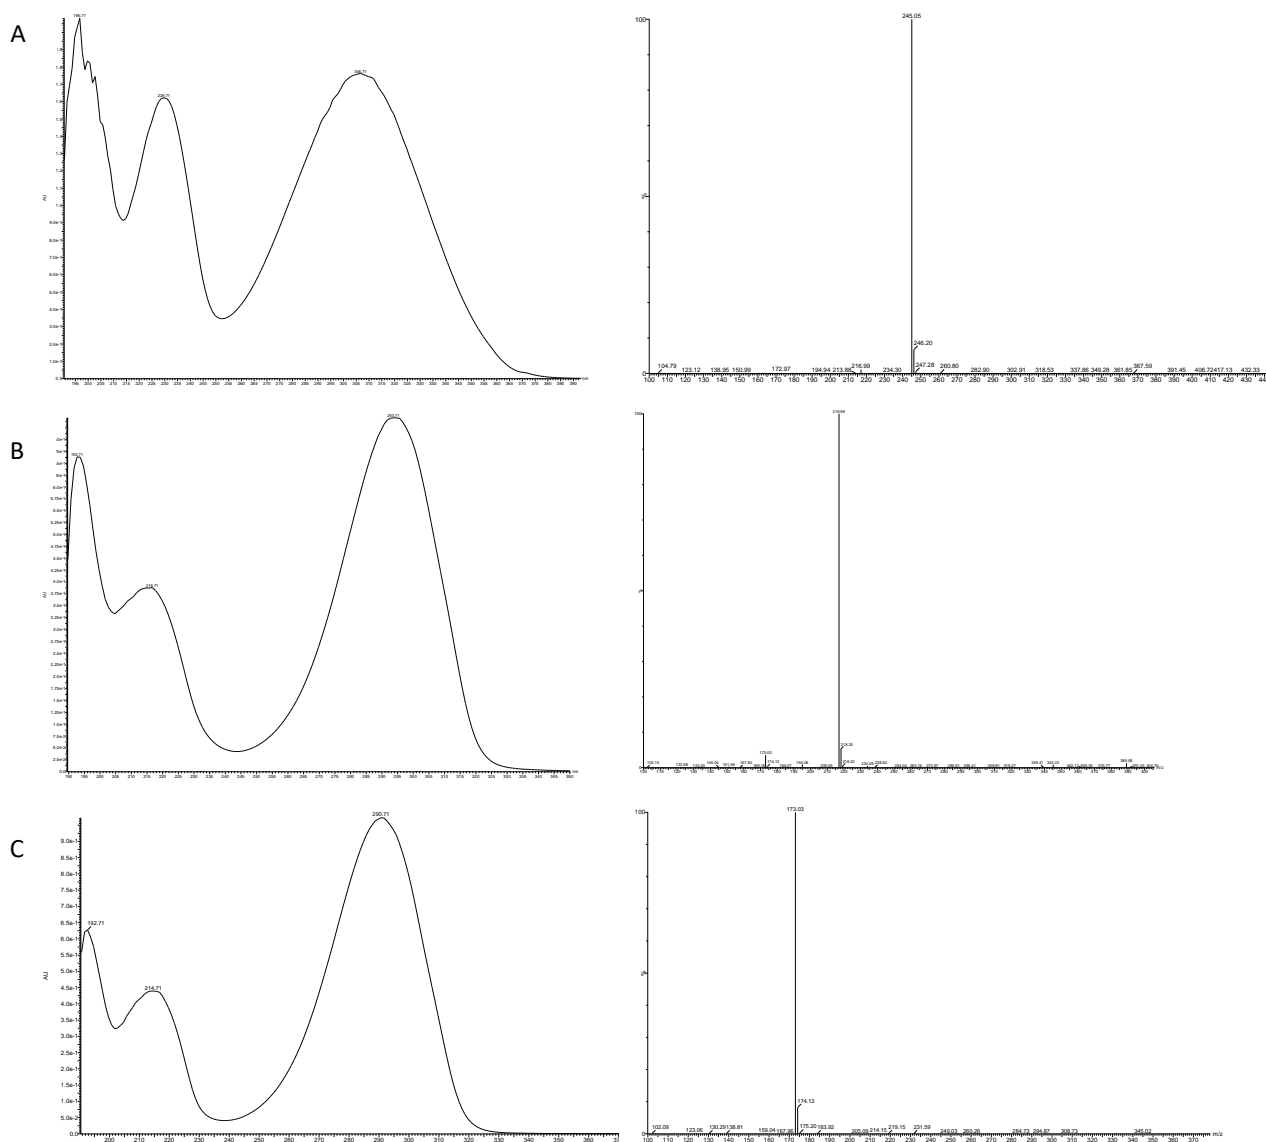

**Figure S2.** UV-vis spectra (left) and LR ESI-MS spectra (right) of compounds **2a** (A), **2b** (B) and **3** (C). Data was obtained from UV-HPLC-MS analysis showed in Figure S1.

**Table S1.** UV-vis and LR ESI-MS characterization of compounds **2a**, **2b** and **3**.<sup>a</sup>

| Compound  | $\lambda_{\max}$ (nm) | $m/z$ (exp.) | $m/z$ (calc.)                                                                                        |
|-----------|-----------------------|--------------|------------------------------------------------------------------------------------------------------|
| <b>2a</b> | 307                   | 245.05       | 245.11 C <sub>11</sub> H <sub>15</sub> F <sub>2</sub> N <sub>2</sub> O <sub>2</sub> [M] <sup>+</sup> |
| <b>2b</b> | 294                   | 216.99       | 217.08 C <sub>9</sub> H <sub>11</sub> F <sub>2</sub> N <sub>2</sub> O <sub>2</sub> [M] <sup>+</sup>  |
| <b>3</b>  | 291                   | 173.03       | 173.09 C <sub>8</sub> H <sub>11</sub> F <sub>2</sub> N <sub>2</sub> [M] <sup>+</sup>                 |

<sup>a</sup> Data was collected from UV-vis and LR ESI-MS spectra showed in Figure S2.

## 5.- Capillary electrophoresis analysis of the N-difluoromethylation reaction of DMAP.

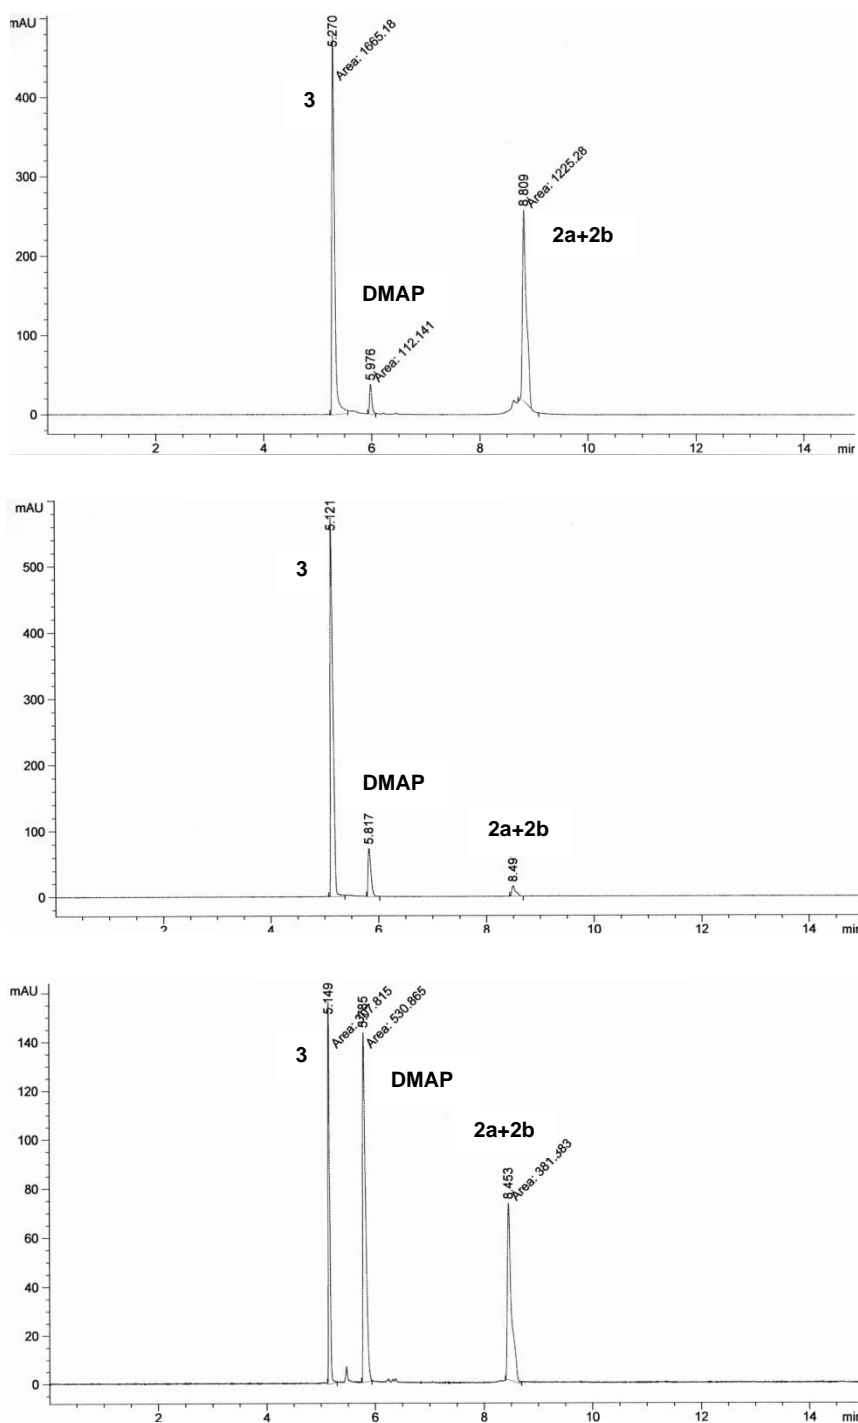

**Figure S3.** Electropherograms of the N-difluoromethylation reaction of DMAP with **1** in ACN (top), neutralized THF (center) and dioxane (bottom).

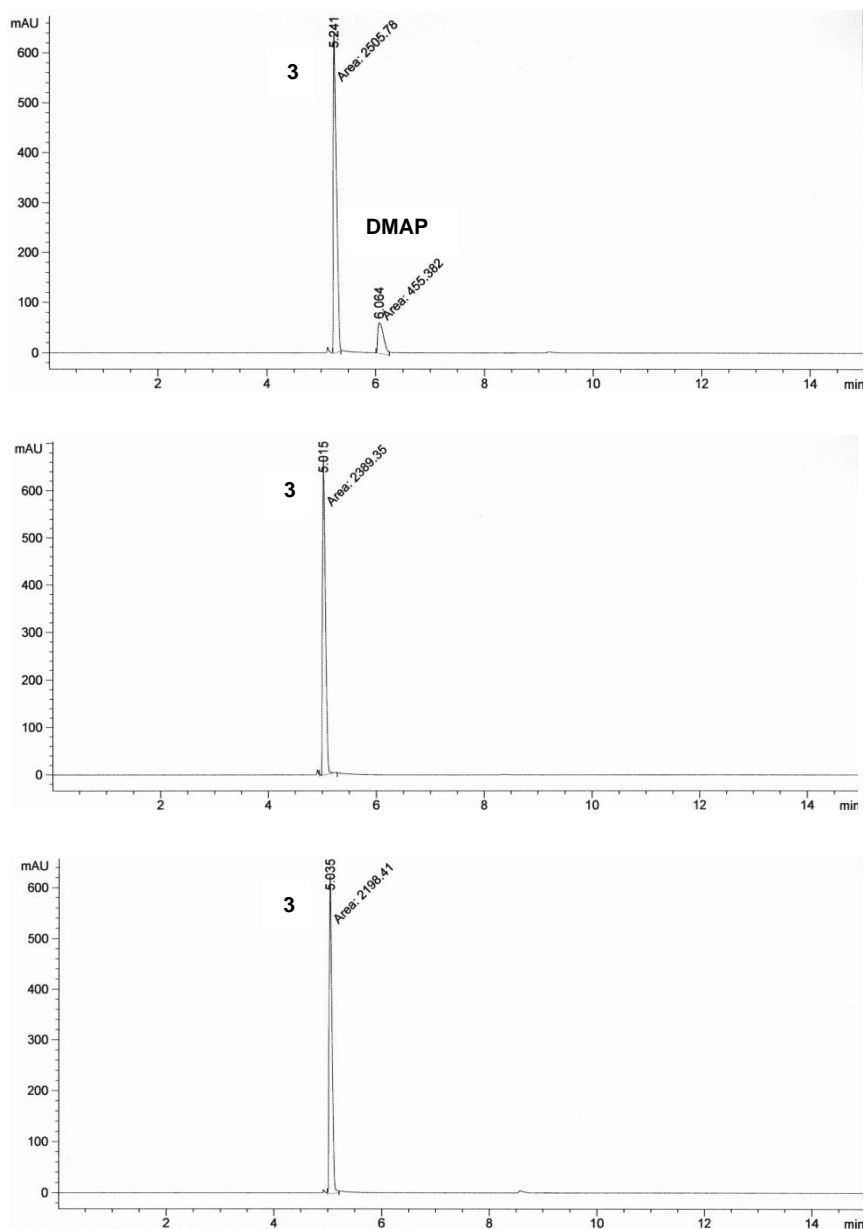

**Figure S4.** Electropherograms of the N-difluoromethylation reaction of DMAP with 1.1 (top), 1.5 (middle) and 3 (bottom) mol equiv. of **1** in a 1:1 mixture of neutralized THF and ACN at 60°C for 24 h.

**6.-  $^1\text{H}$  and  $^{19}\text{F}$  NMR and HR ESI-MS analysis of the N-difluoromethylation reaction of DMAP in  $\text{CD}_3\text{CN}/\text{D}_2\text{O}$  98:2 (v/v).**

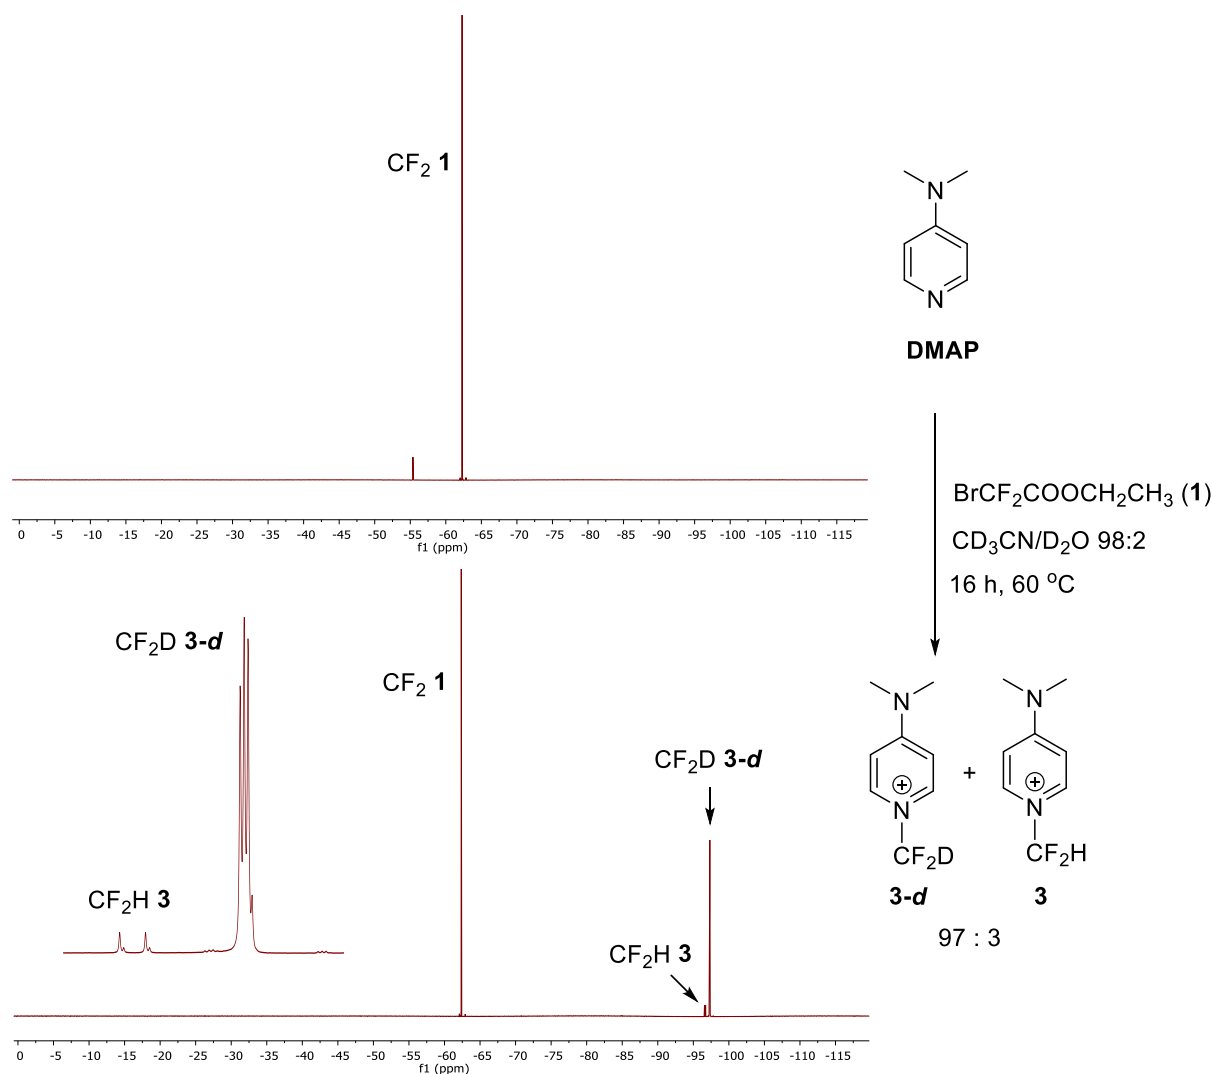

**Figure S5.** Top:  $^{19}\text{F}$  NMR spectra (376 MHz) of a freshly prepared solution of DMAP (25 mg, 0.20 mmol) and ethyl bromodifluoroacetate (53  $\mu\text{L}$ , 0.41 mmol) in 4 mL of a 98:2 (v/v) mixture of  $\text{CD}_3\text{CN}$  and  $\text{D}_2\text{O}$ . Bottom:  $^{19}\text{F}$  NMR spectra (376 MHz) after heating for 16 h at 60°C.

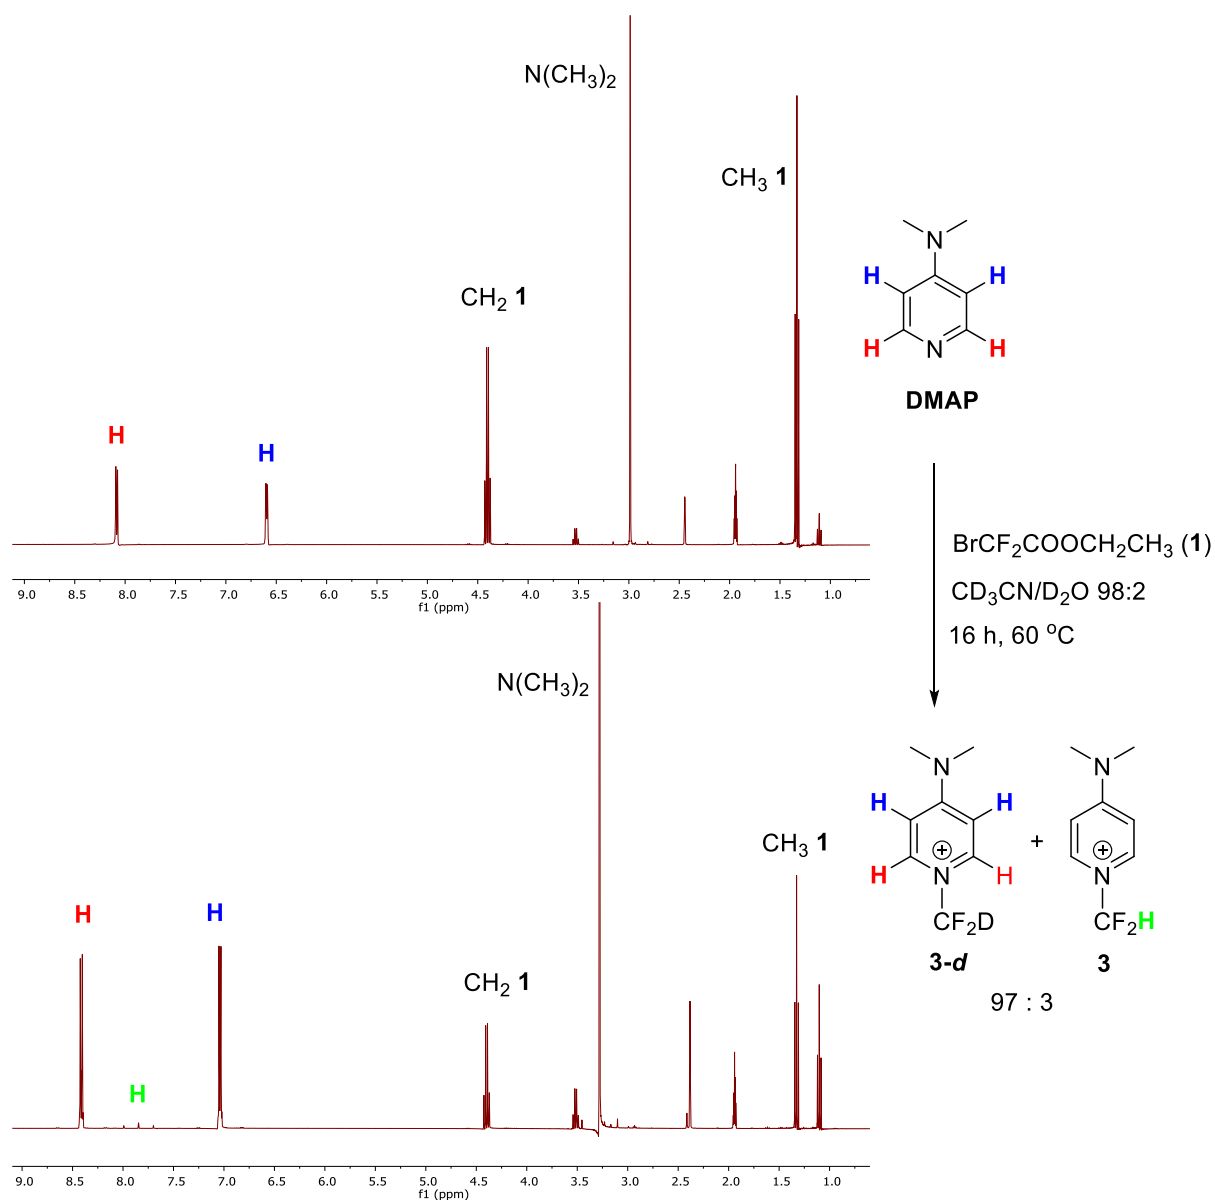

**Figure S6.** Top: <sup>1</sup>H NMR spectra (400 MHz) of a freshly prepared solution of DMAP (25 mg, 0.20 mmol) and ethyl bromodifluoroacetate (53 μL, 0.41 mmol) in 4 mL of a 98:2 (v/v) mixture of CD<sub>3</sub>CN and D<sub>2</sub>O. Bottom: <sup>1</sup>H NMR spectra (400 MHz) after heating for 16 h at 60°C.

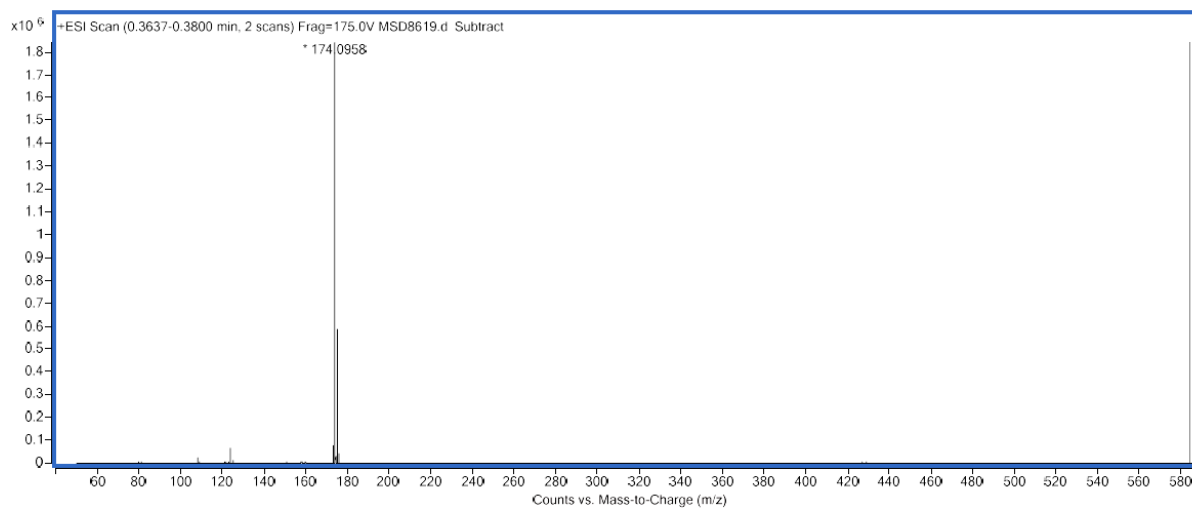

**Figure S7.** HR ESI-MS spectrum of reaction crude between DMAP and ethyl bromodifluoroacetate in a 98:2 (v/v) mixture of CD<sub>3</sub>CN and D<sub>2</sub>O after heating for 16 h at 60°C.

**Table S2.** HR ESI-MS characterization of compounds **3** and **3-d**.

| Compound   | <i>m/z</i> (exp.) | <i>m/z</i> (calc.)                                                                                   |
|------------|-------------------|------------------------------------------------------------------------------------------------------|
| <b>3-d</b> | 174.0958          | 174.0948 C <sub>8</sub> H <sub>10</sub> DF <sub>2</sub> N <sub>2</sub> <sup>+</sup> [M] <sup>+</sup> |
| <b>3</b>   | 173.0886          | 173.0885 C <sub>8</sub> H <sub>11</sub> F <sub>2</sub> N <sub>2</sub> [M] <sup>+</sup>               |

## 7.- Stability of compound **2b** in CD<sub>3</sub>CN by <sup>1</sup>H NMR.

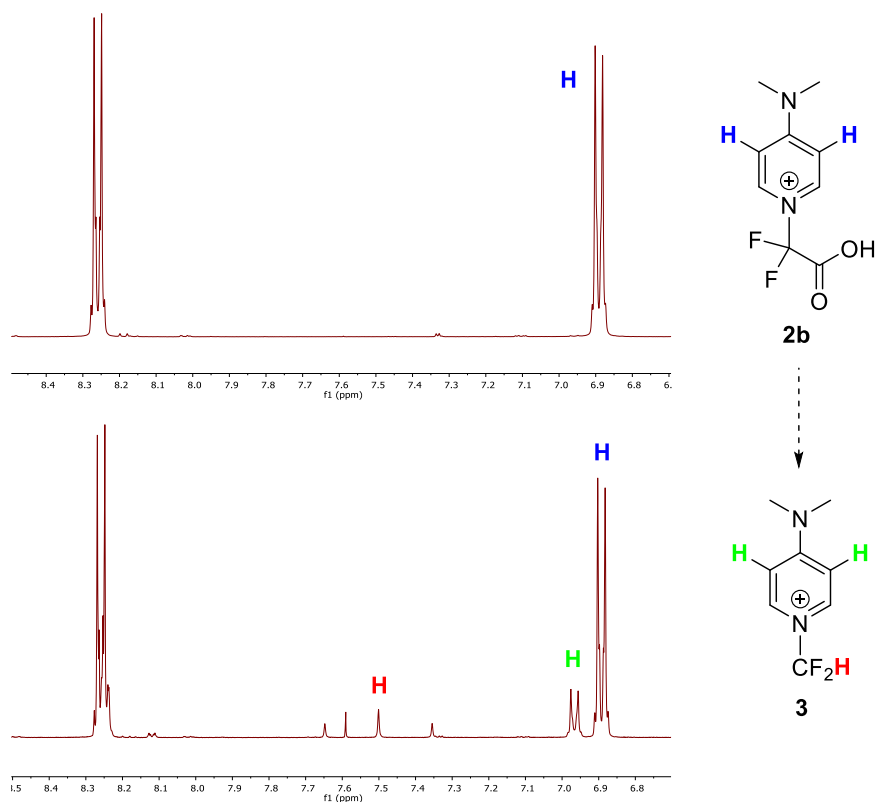

**Figure S8.** Comparison of the region between 6.7 and 8.5 ppm of the <sup>1</sup>H NMR spectra (400 MHz) of a freshly prepared solution of compound **2b** in CD<sub>3</sub>CN (top) with the same region after standing for 96 h at room temperature (bottom).

## 8.- $^1\text{H}$ and $^{19}\text{F}$ NMR analysis of the N-difluoromethylation reaction of 4-6

### Compound 4a

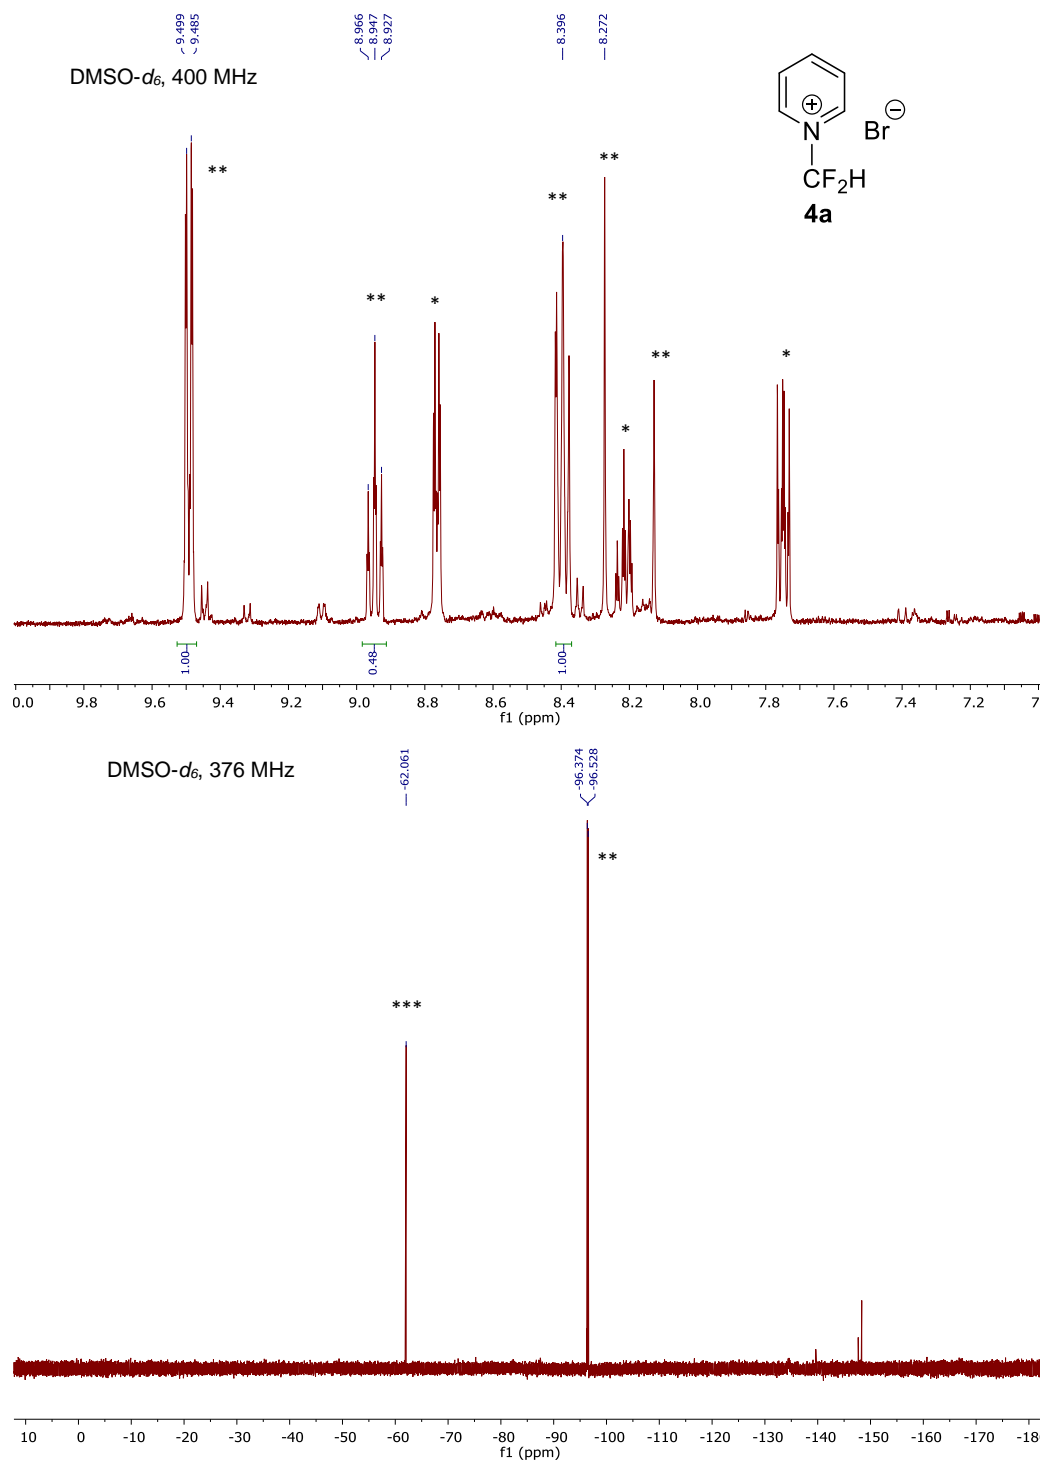

**Figure S9.** Aromatic region of the  $^1\text{H}$  NMR (top) and  $^{19}\text{F}$  NMR (bottom) spectra for the N-difluoromethylation reaction of pyridine (**4**) with 5 mol equiv. of **1** in a 1:1 mixture of neutralized THF and ACN at 60°C for 24 h. After removal of the solvent under reduced pressure, the reaction crude was dissolved in DMSO- $d_6$  to register the  $^1\text{H}$  and  $^{19}\text{F}$  NMR spectra. \* = pyridine signals. \*\* = compound **4a** signals. \*\*\* = compound **1** signal.



## Compound 5a

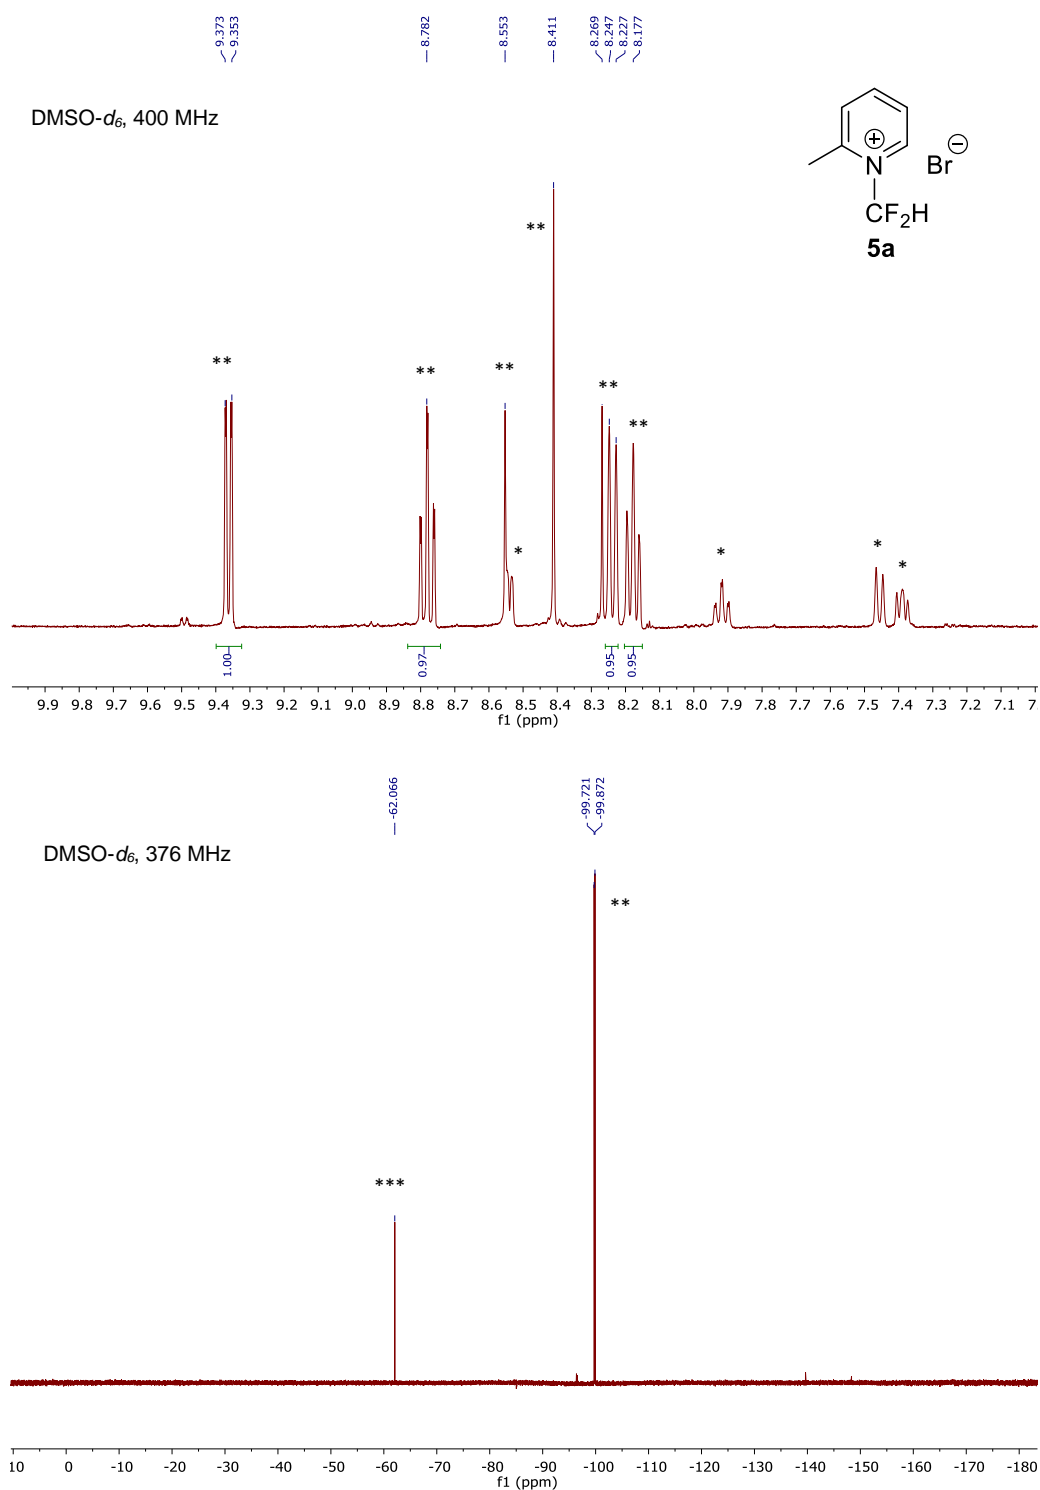

**Figure S10.** Aromatic region of the <sup>1</sup>H NMR (top) and <sup>19</sup>F NMR (bottom) spectra for the N-difluoromethylation reaction of 2-picoline (**5**) with 5 mol equiv. of **1** in a 1:1 mixture of neutralized THF and ACN at 60°C for 24 h. After removal of the solvent under reduced pressure, the reaction crude was dissolved in DMSO-*d*<sub>6</sub> to register the <sup>1</sup>H and <sup>19</sup>F NMR spectra. \* = 2-picoline signals. \*\* = compound **5a** signals. \*\*\* = compound **1** signal.

## Compound 6a

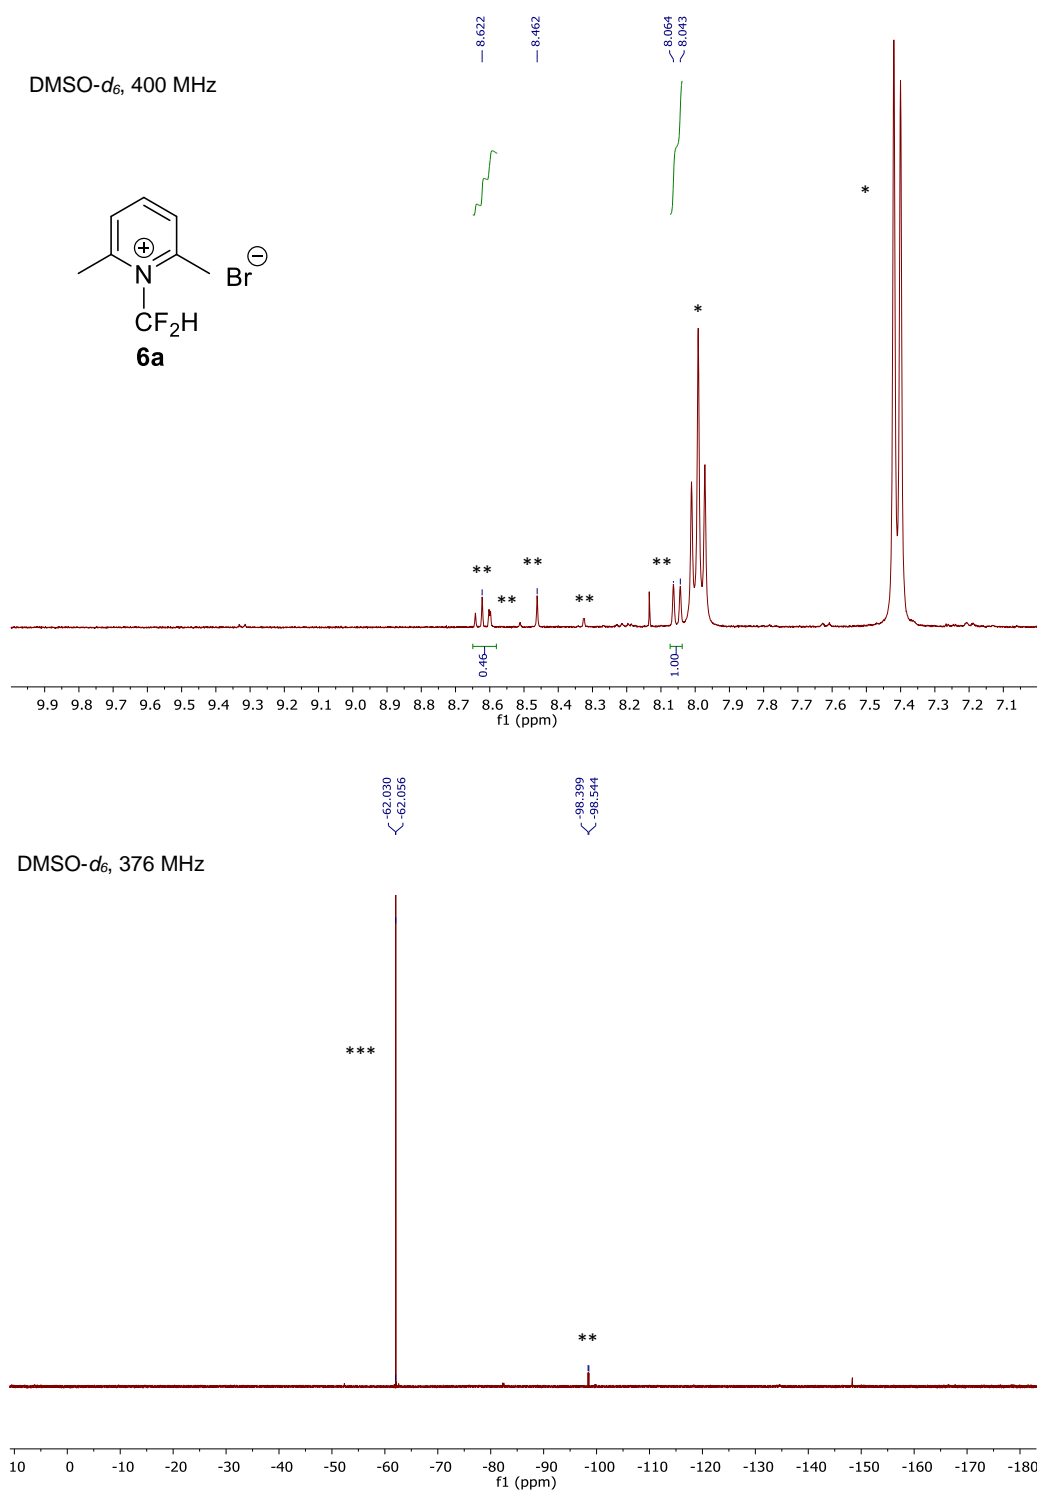

**Figure S11.** Aromatic region of the <sup>1</sup>H NMR (top) and <sup>19</sup>F NMR (bottom) spectra for the N-difluoromethylation reaction of 2,6-lutidine (**6**) with 5 mol equiv. of **1** in a 1:1 mixture of neutralized THF and ACN at 60°C for 24 h. After removal of the solvent under reduced pressure, the reaction crude was dissolved in DMSO-*d*<sub>6</sub> to register the <sup>1</sup>H and <sup>19</sup>F NMR spectra. \* = 2,6-lutidine signals. \*\* = compound **6a** signals. \*\*\* = compound **1** signal.

## 9.- HPLC analysis of fluorophores 8b and 9a-9b

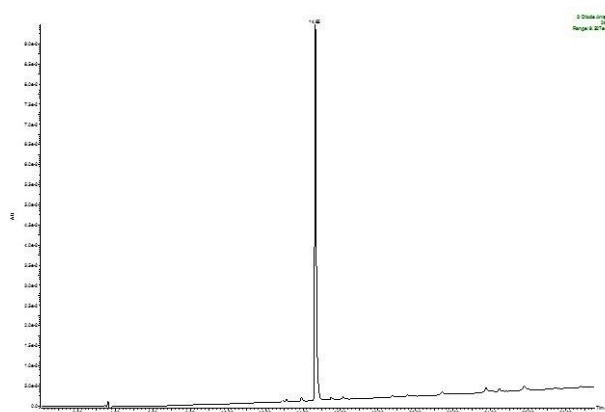

**Figure S12.** Reversed-phase HPLC-MS analysis of purified compound **8b**.

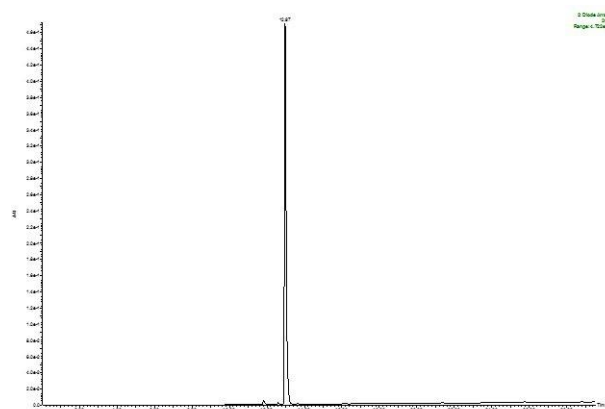

**Figure S13.** Reversed-phase HPLC-MS analysis of purified compound **9a**.

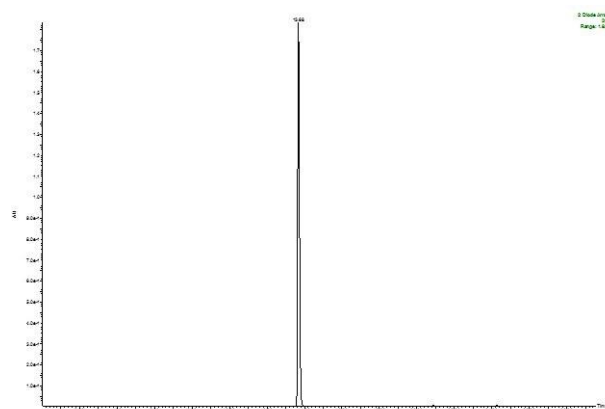

**Figure S14.** Reversed-phase HPLC-MS analysis of purified compound **9b**.

## 10.- HPLC-MS analysis of the N-difluoromethylation reaction of 10-11

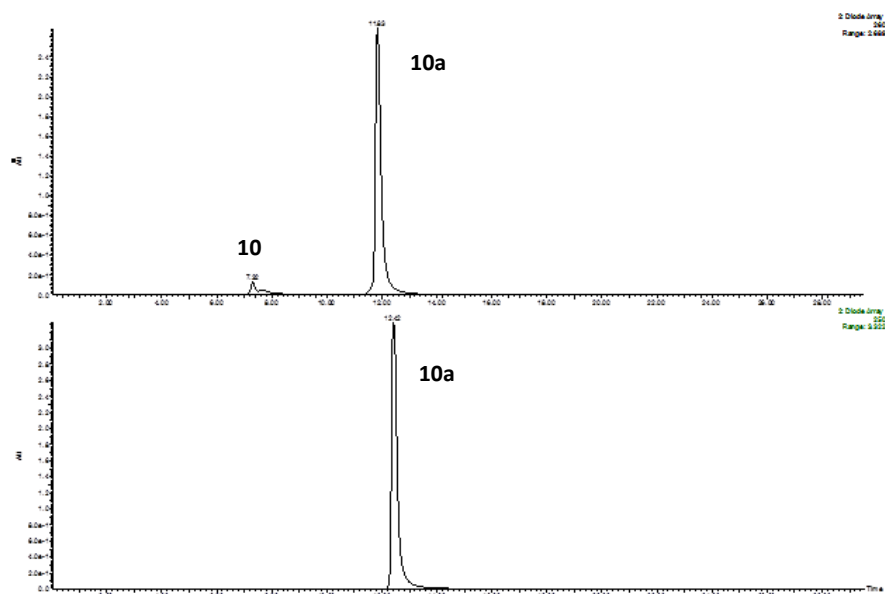

**Figure S15.** Reversed-phase HPLC-MS analysis for the N-difluoromethylation reaction of **10**: crude after 24 h (top) and purified compound **10b**.

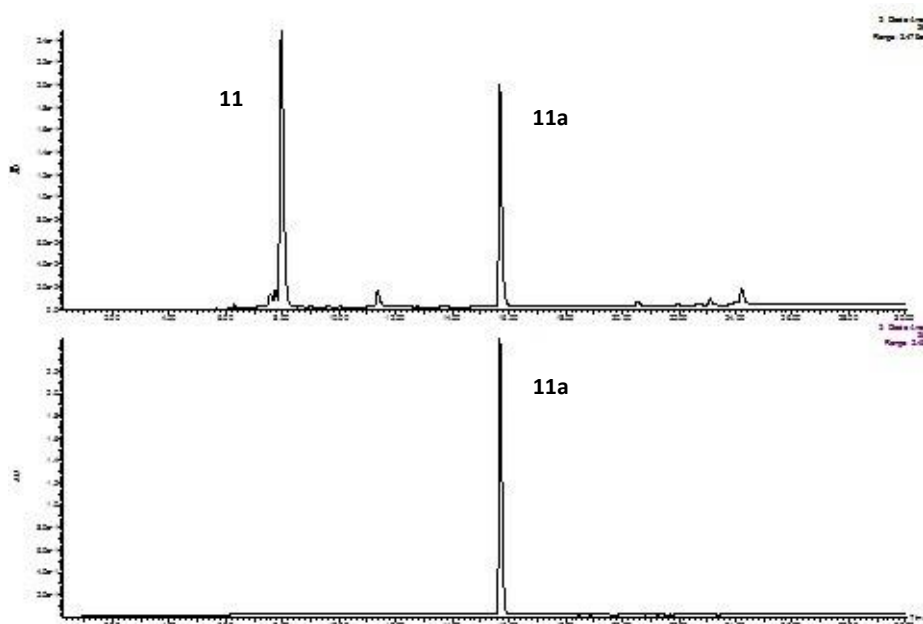

**Figure S16.** Reversed-phase HPLC-MS analysis for the N-difluoromethylation reaction of **11**: crude after 24 h (top) and purified compound **11a**.

# 11.- $^1\text{H}$ , $^{13}\text{C}$ and $^{19}\text{F}$ NMR spectra and HR ESI-MS of the compounds

## Compound 2b

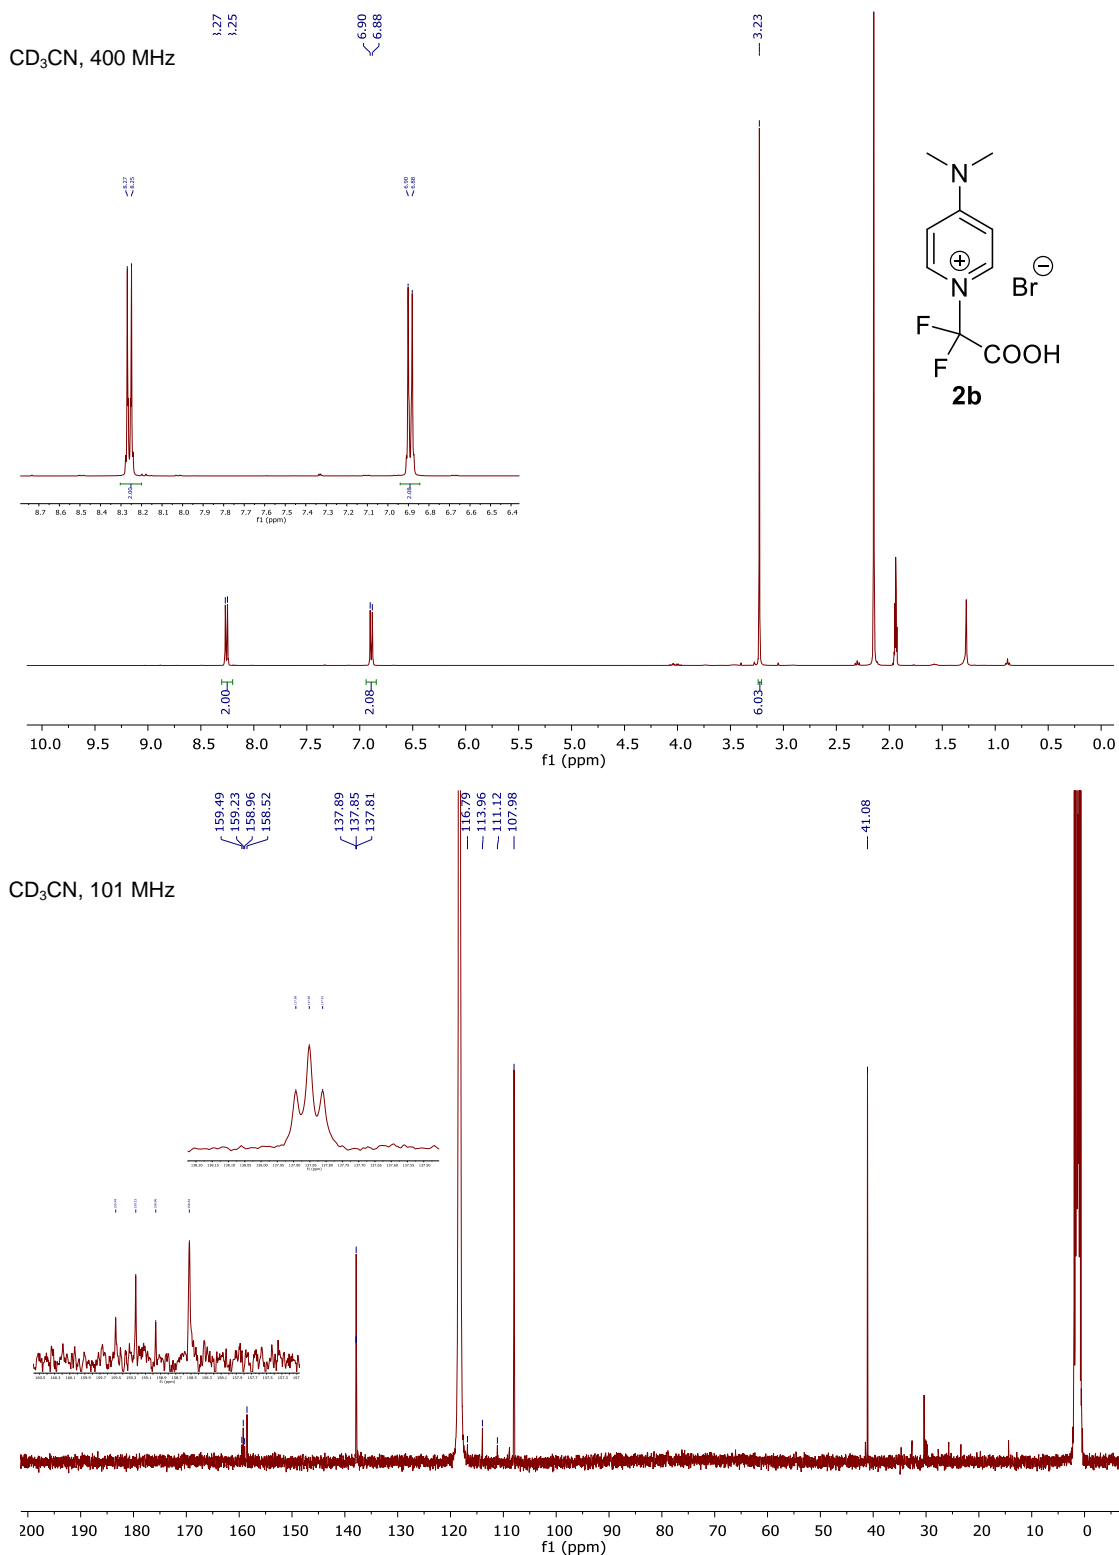

Figure S17.  $^1\text{H}$  and  $^{13}\text{C}$  NMR spectra of compound **2b** in  $\text{CD}_3\text{CN}$ .

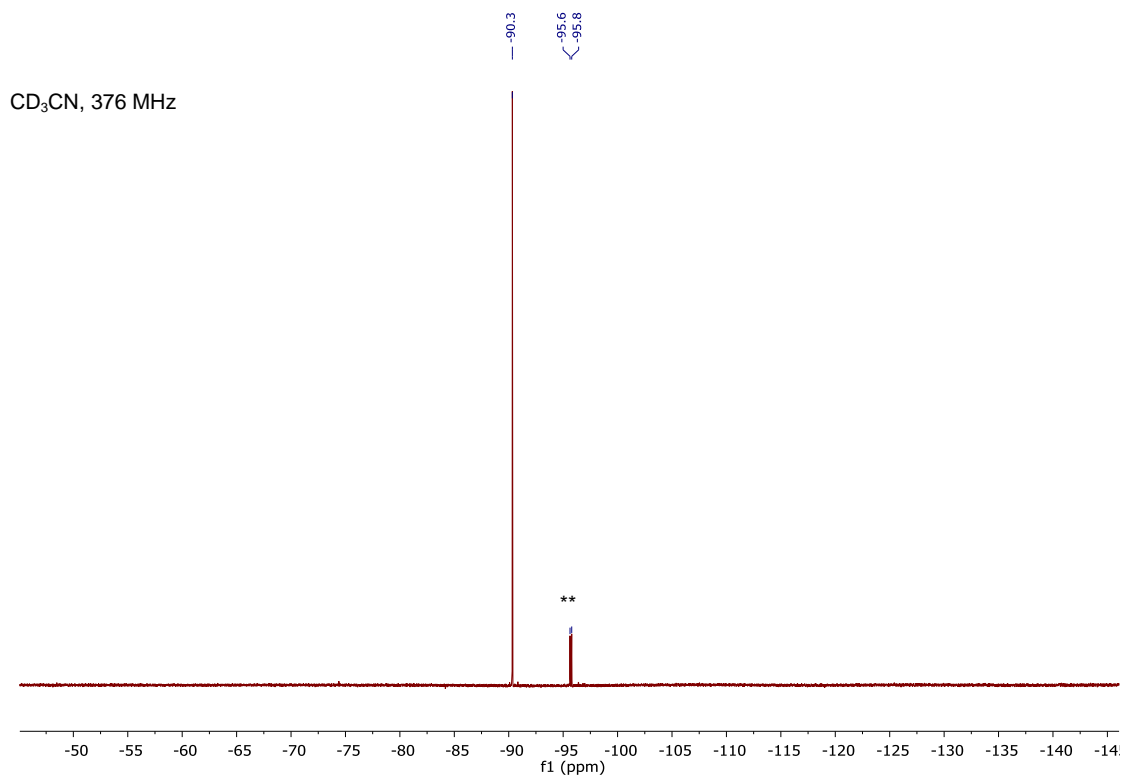

**Figure S18.** <sup>19</sup>F NMR spectra of compound **2b** in CD<sub>3</sub>CN.\*\* This doublet corresponds to the fluorine atoms of the CF<sub>2</sub>H group in compound **3**, which was spontaneously generated from **2b** after standing in CD<sub>3</sub>CN solution for 48 h prior to the registration of the <sup>19</sup>F NMR.

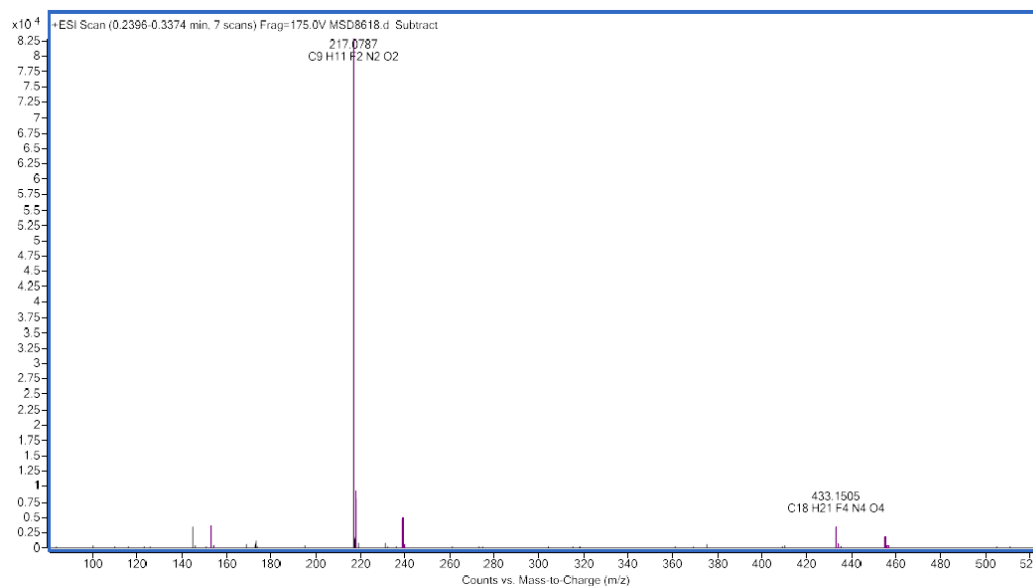

**Figure S19.** HR ESI-MS spectrum of compound **2b**.

# Compound 3

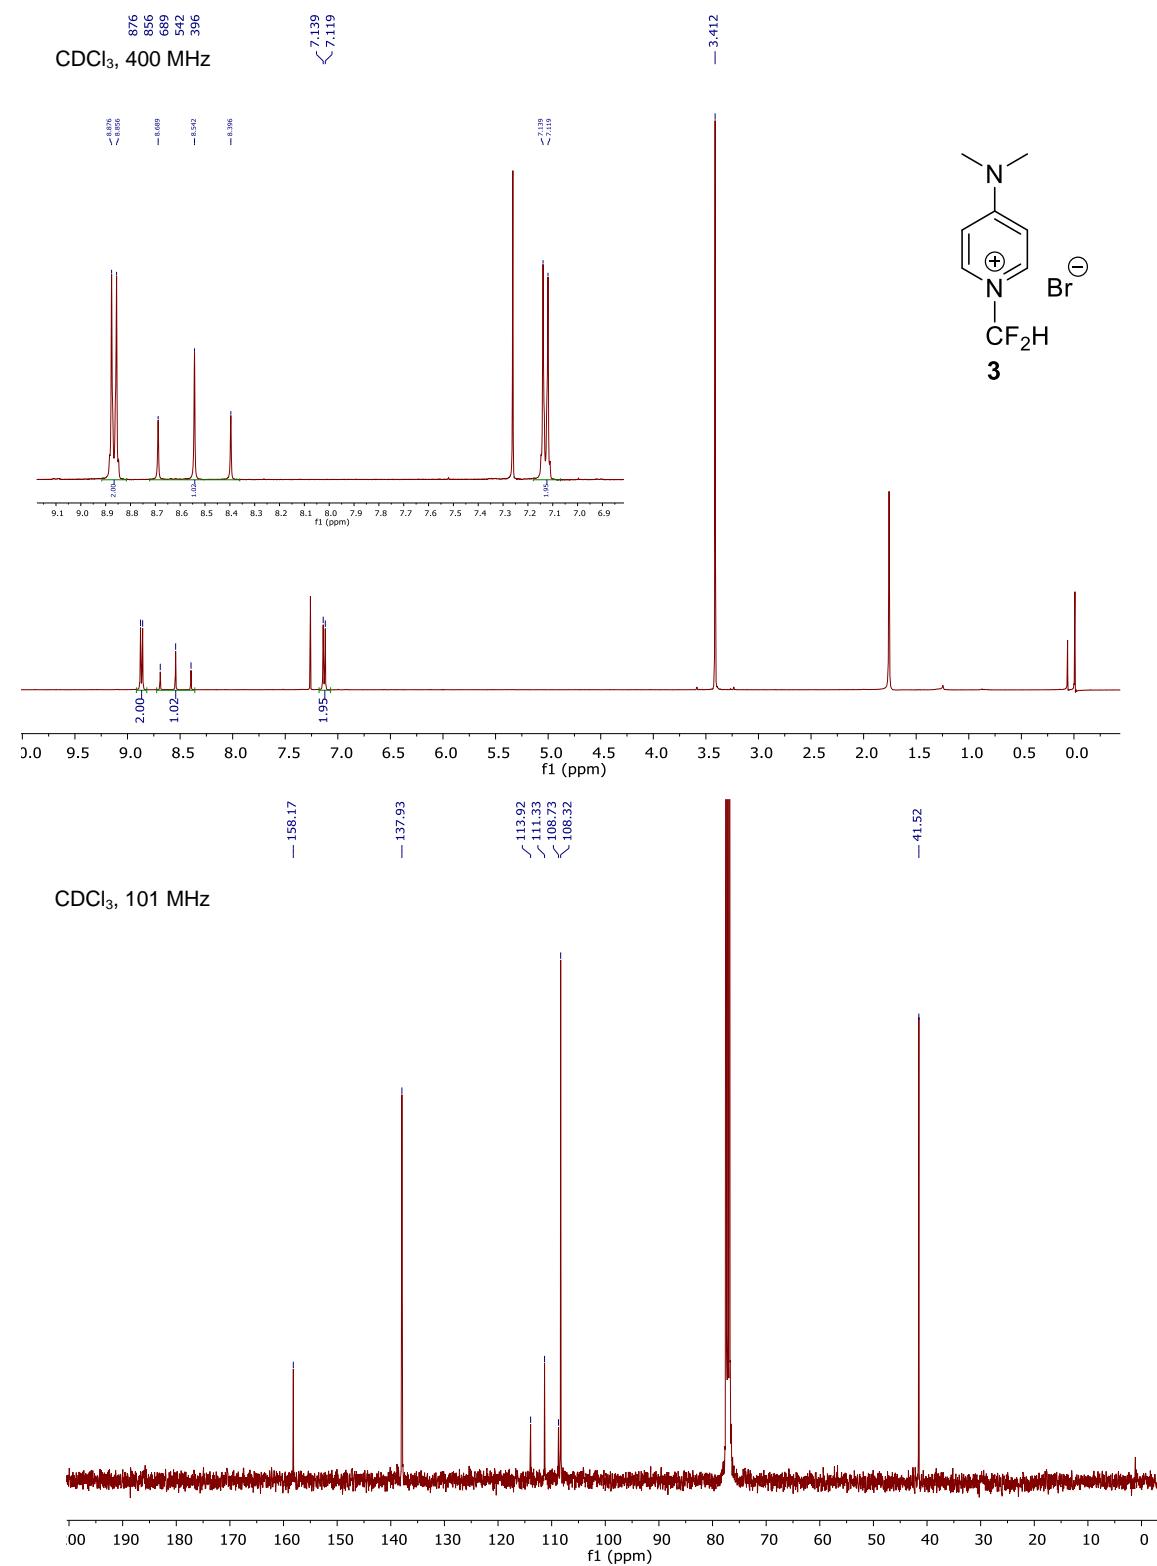

Figure S20. <sup>1</sup>H and <sup>13</sup>C NMR spectra of compound **3** in CDCl<sub>3</sub>.

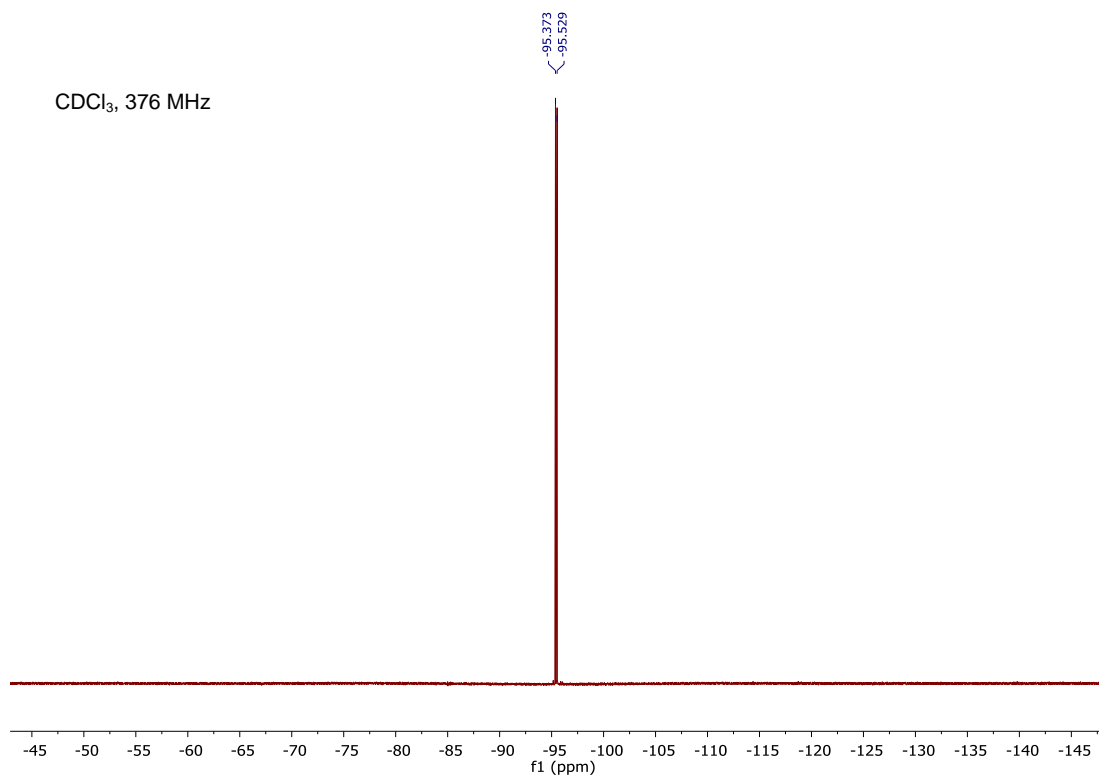

**Figure S21.** <sup>19</sup>F NMR spectra of compound **3** in CDCl<sub>3</sub>.

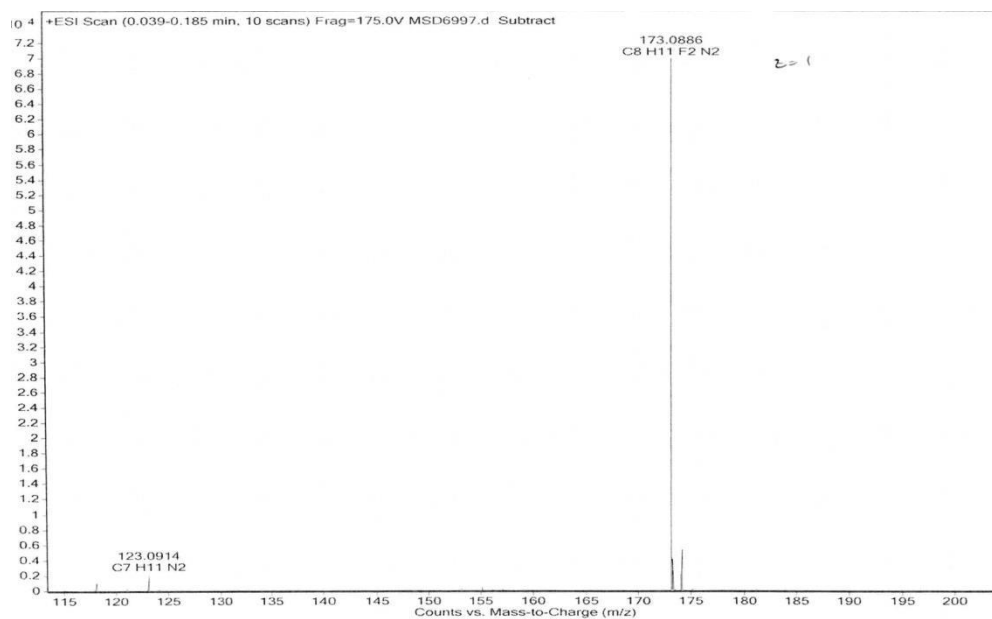

**Figure S22.** HR ESI-MS spectrum of compound **3**.



## Compound 8b

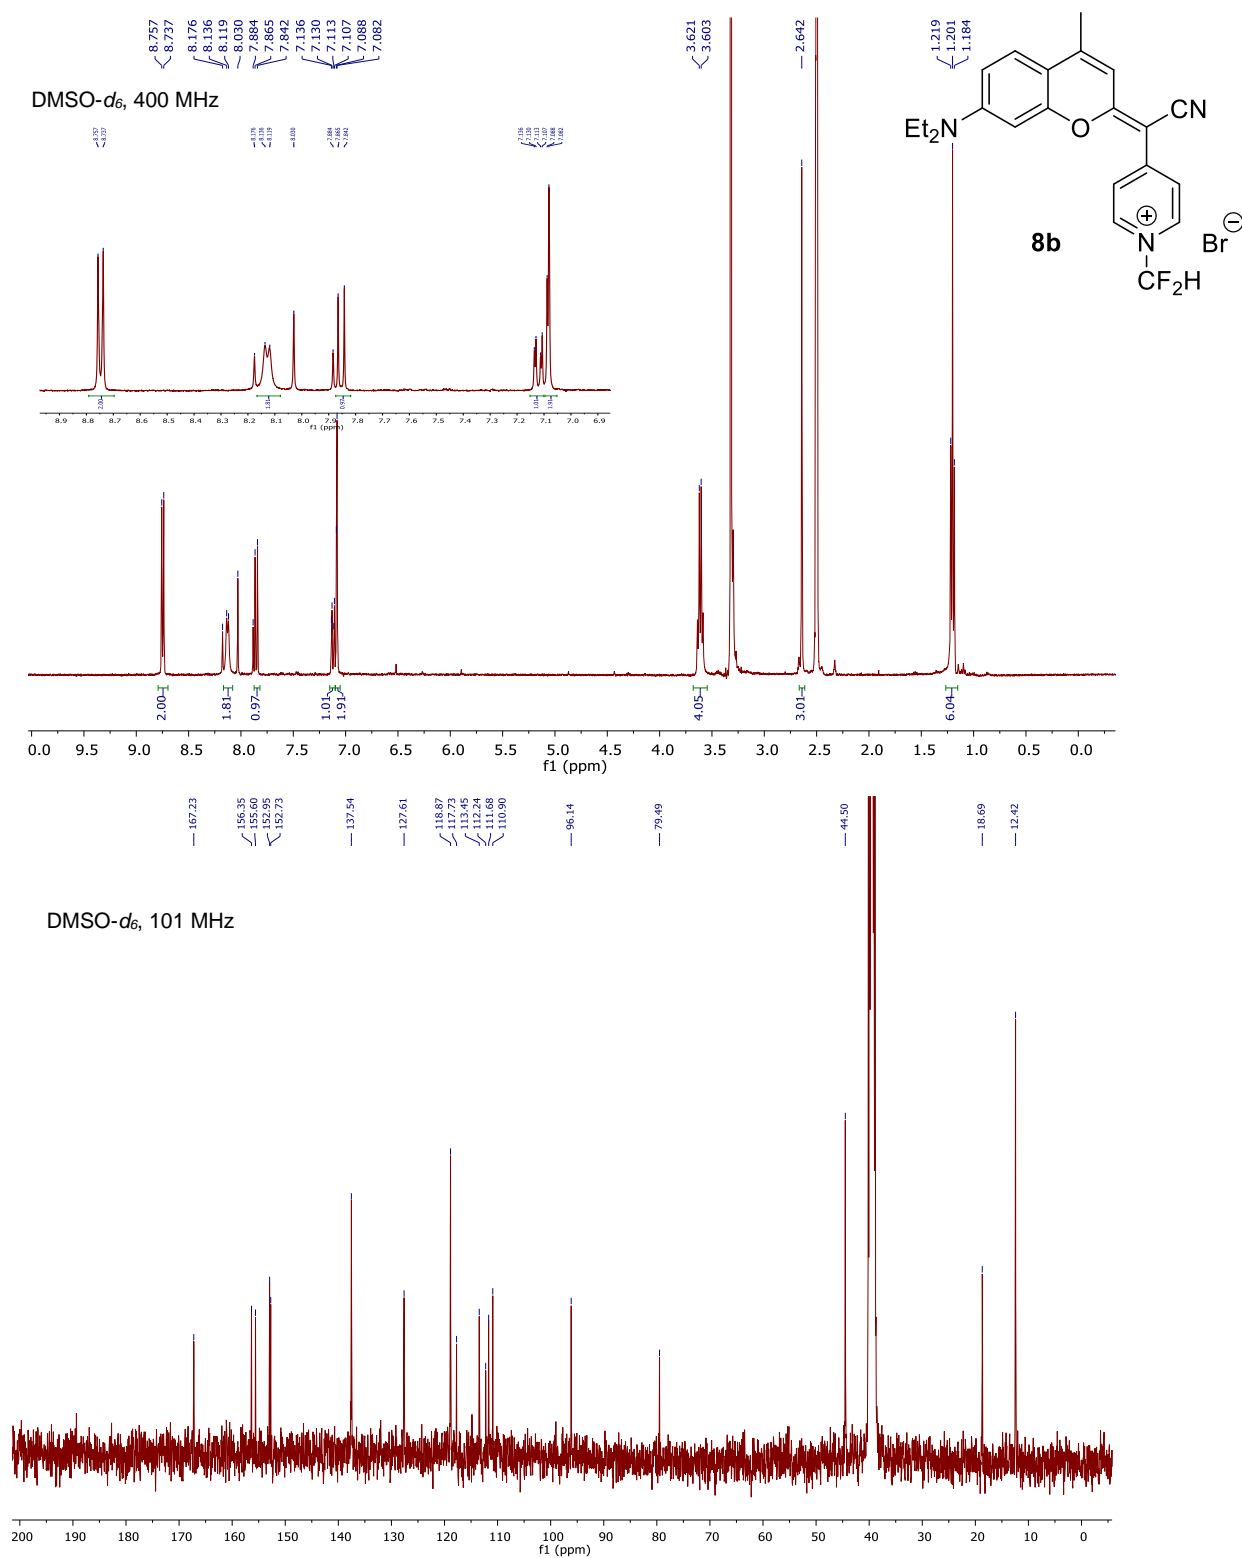

**Figure S23.** <sup>1</sup>H and <sup>13</sup>C NMR spectra of compound **8b** in DMSO-*d*<sub>6</sub>.

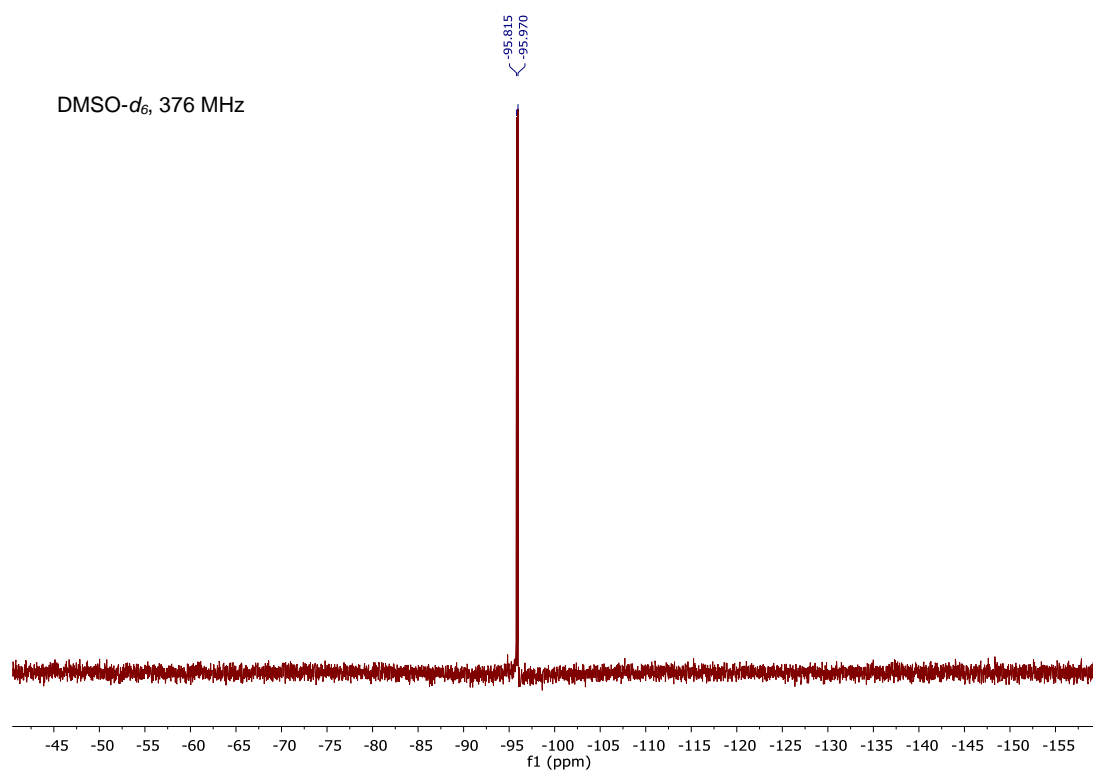

**Figure S24.** <sup>19</sup>F NMR spectra of compound **8b** in DMSO-*d*<sub>6</sub>.

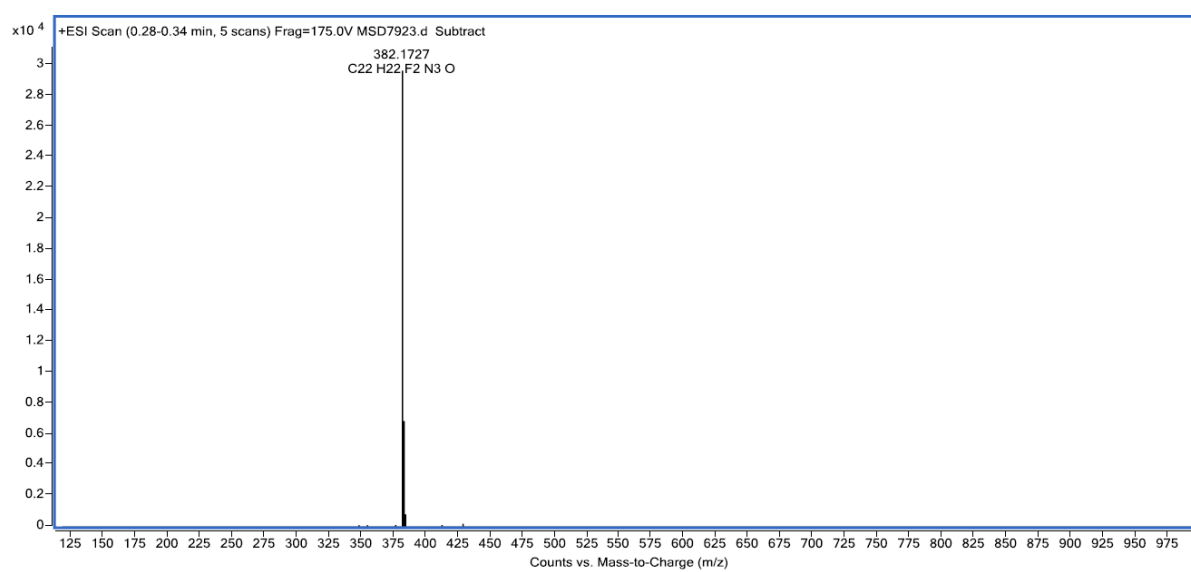

**Figure S25.** HR ESI-MS spectrum of compound **8b**.

## Compound 9a

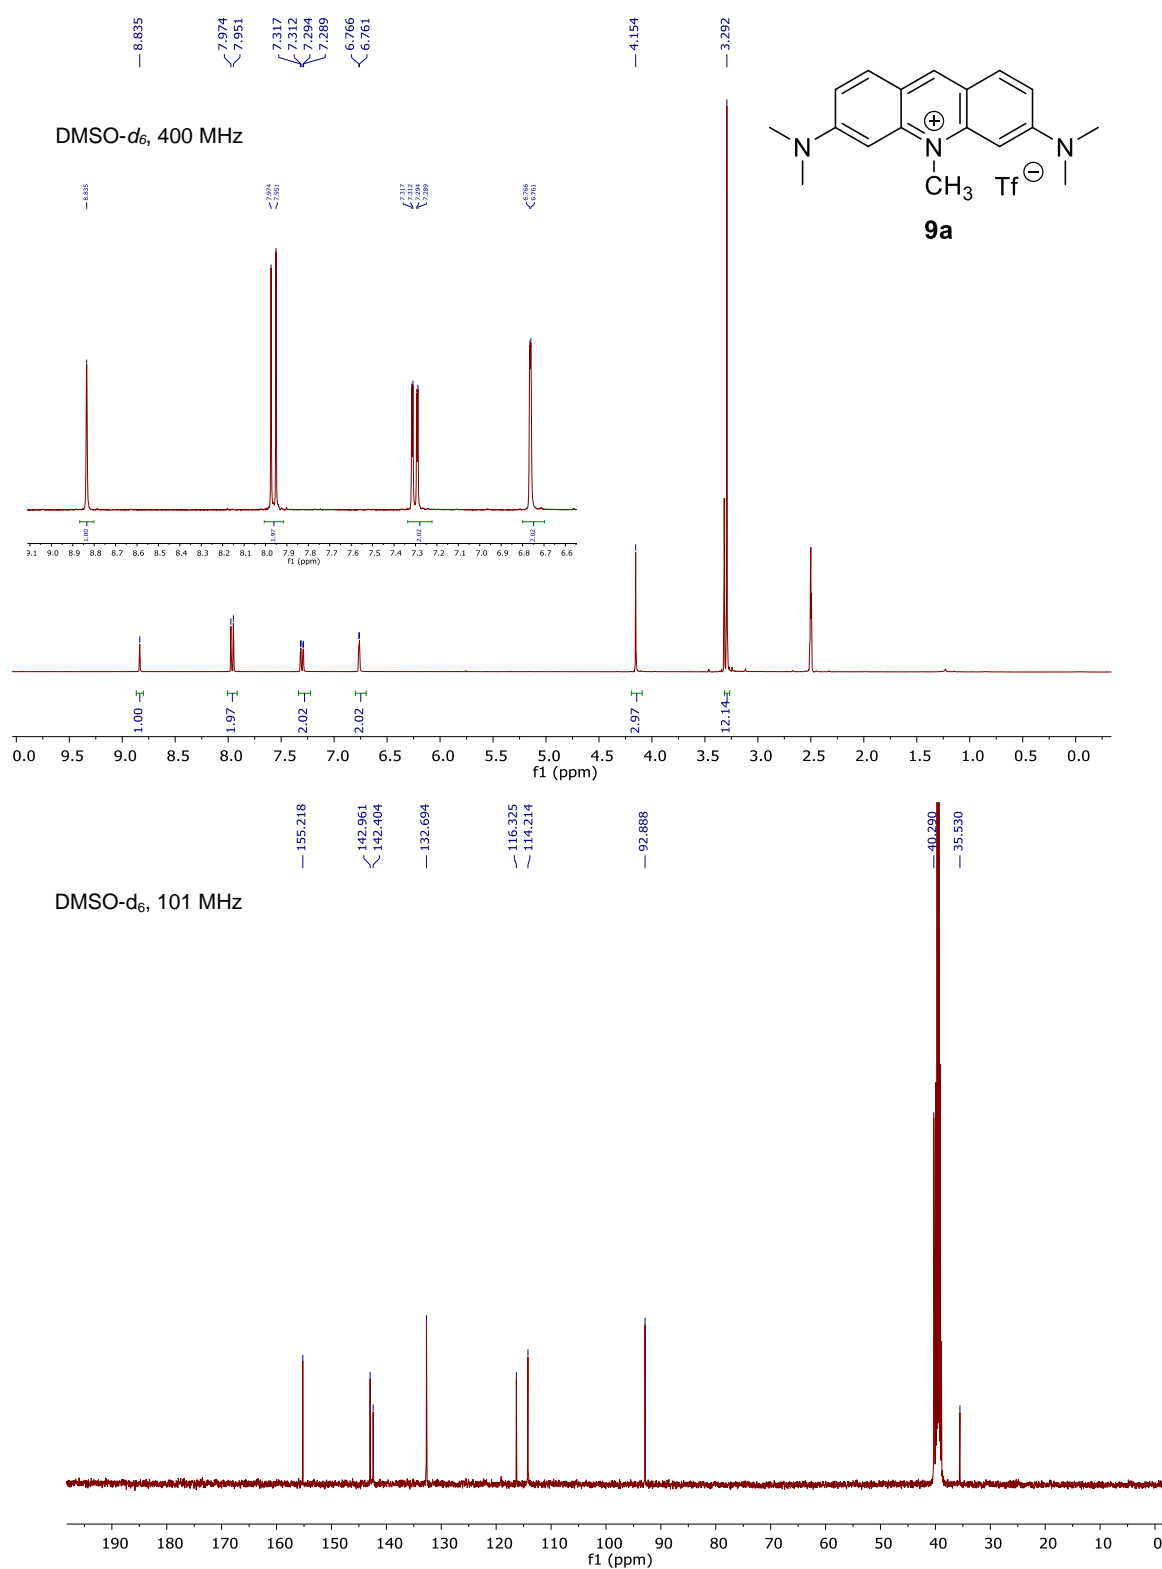

Figure S26. <sup>1</sup>H and <sup>13</sup>C NMR spectra of compound **9a** in DMSO-*d*<sub>6</sub>.

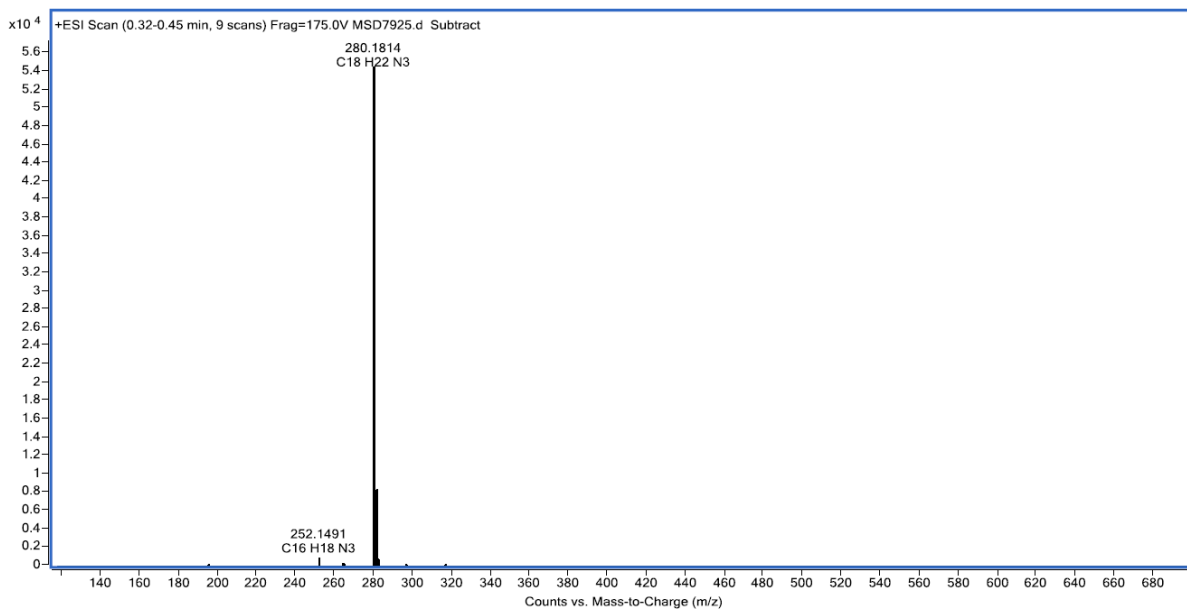

**Figure S27.** HR ESI-MS spectrum of compound **9a**.

## Compound 9b

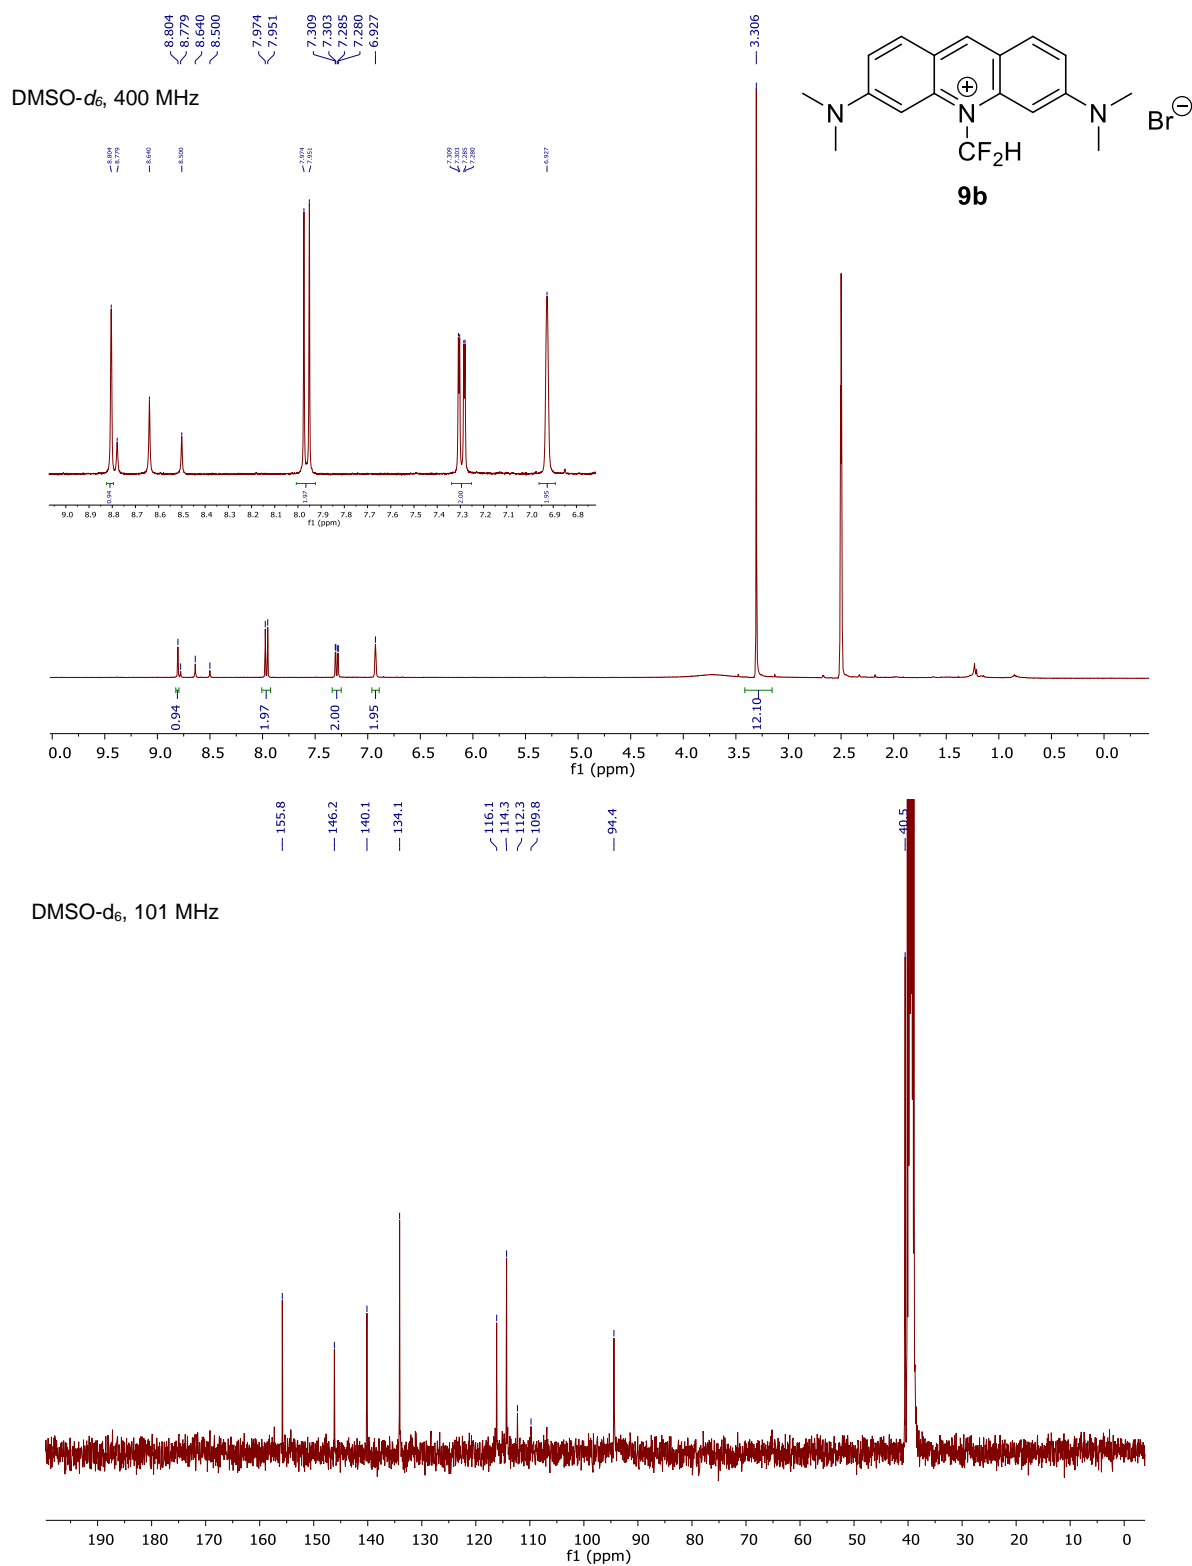

**Figure S28.** <sup>1</sup>H and <sup>13</sup>C NMR spectra of compound **9b** in DMSO-*d*<sub>6</sub>.

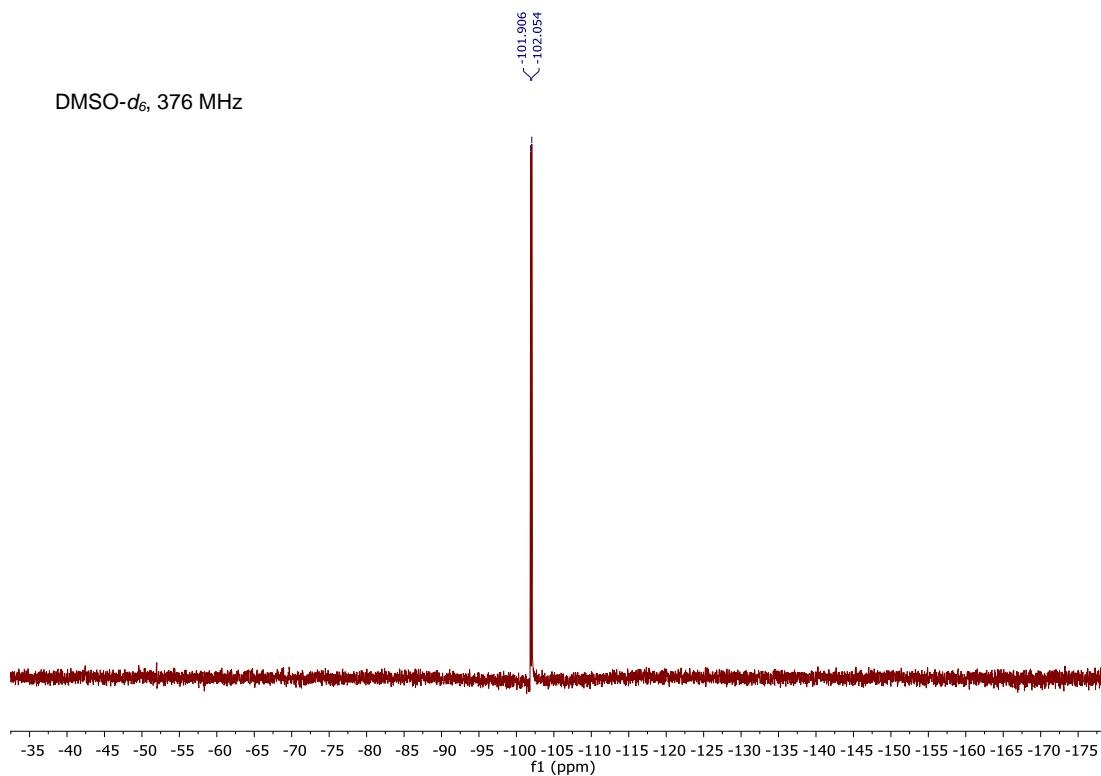

**Figure S29.** <sup>19</sup>F NMR spectra of compound **9b** in DMSO-*d*<sub>6</sub>.

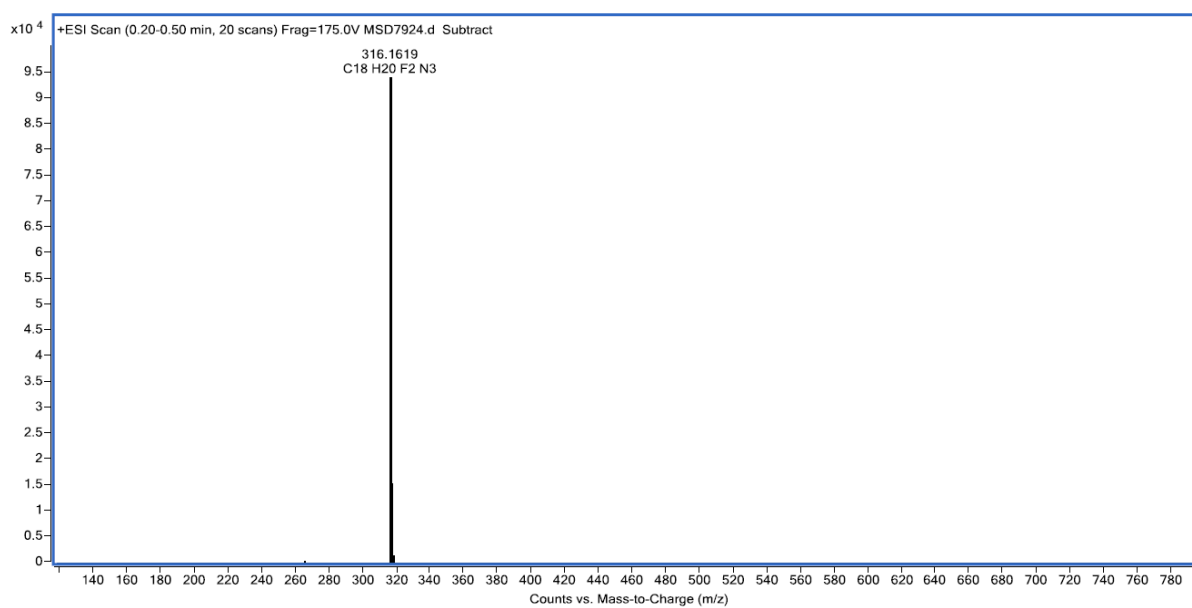

**Figure S30.** HR ESI-MS spectrum of compound **9b**.

# Compound 10b

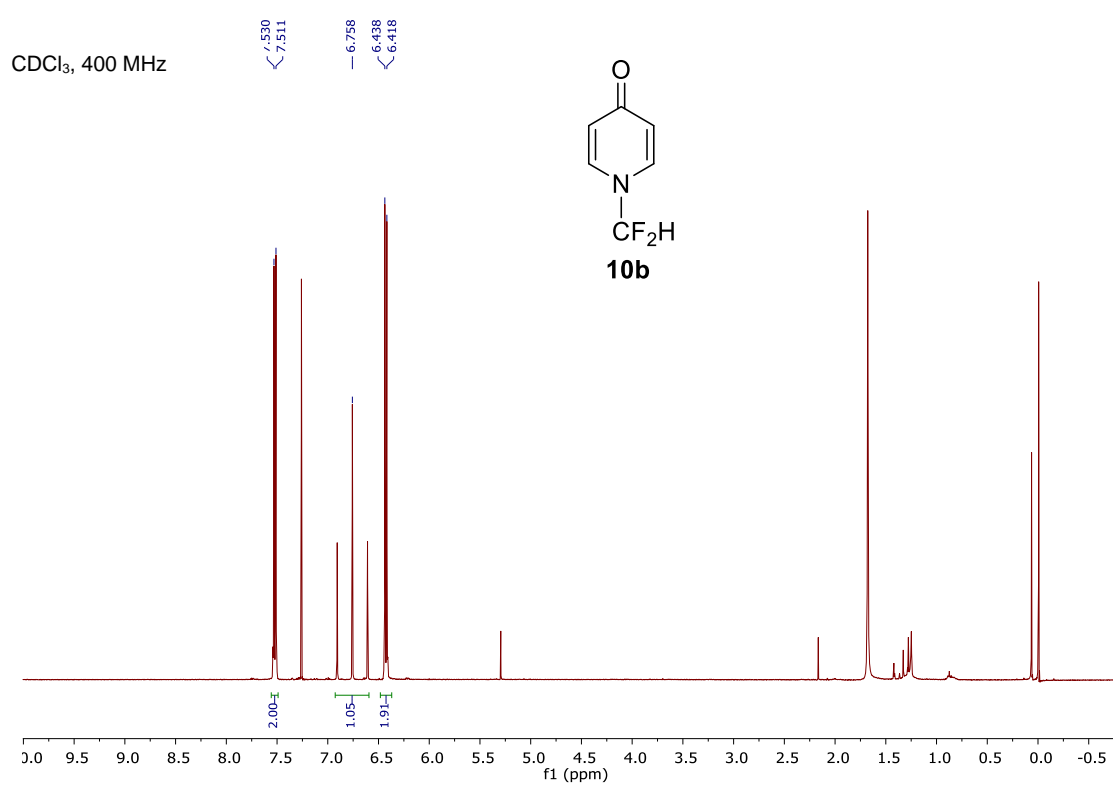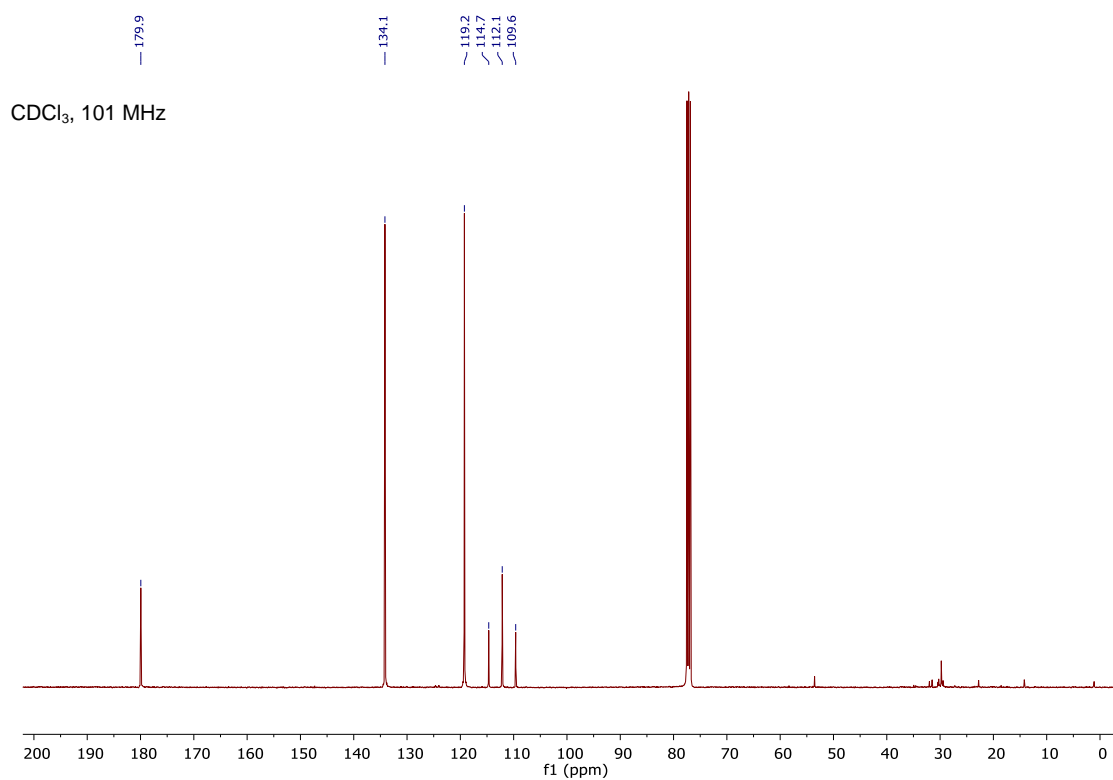

Figure S31. <sup>1</sup>H and <sup>13</sup>C NMR spectra of compound **10b** in CDCl<sub>3</sub>.

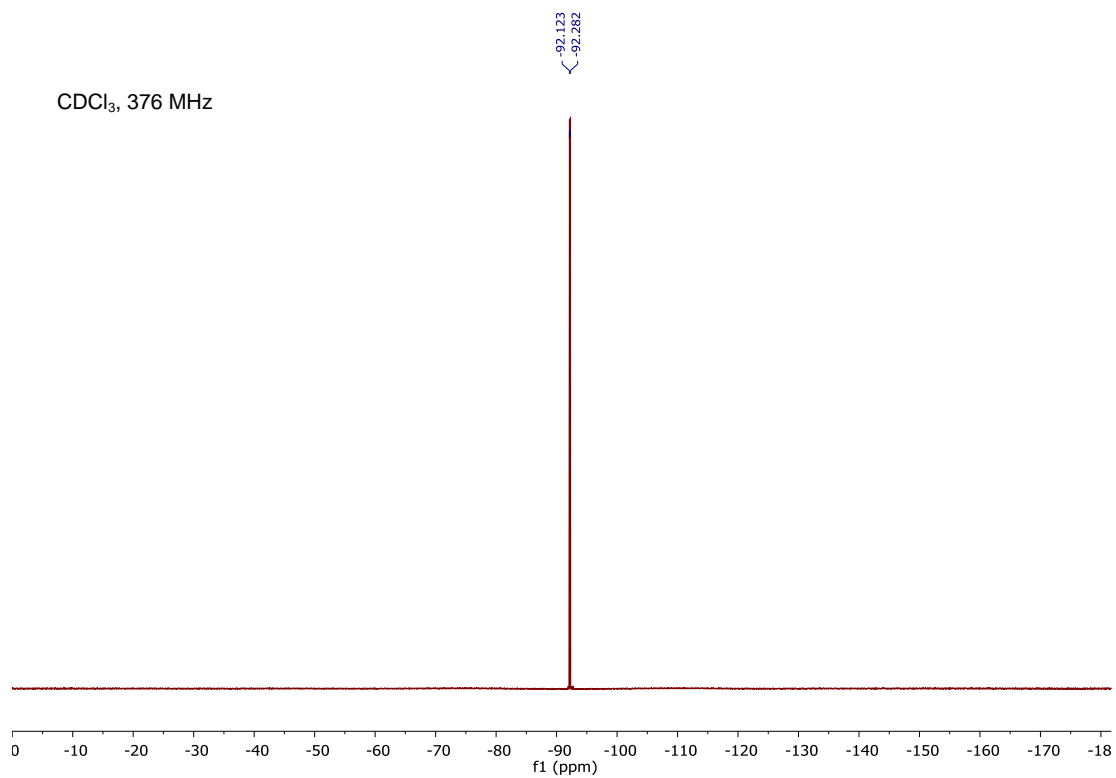

**Figure S32.** <sup>19</sup>F NMR spectra of compound **10b** in CDCl<sub>3</sub>.

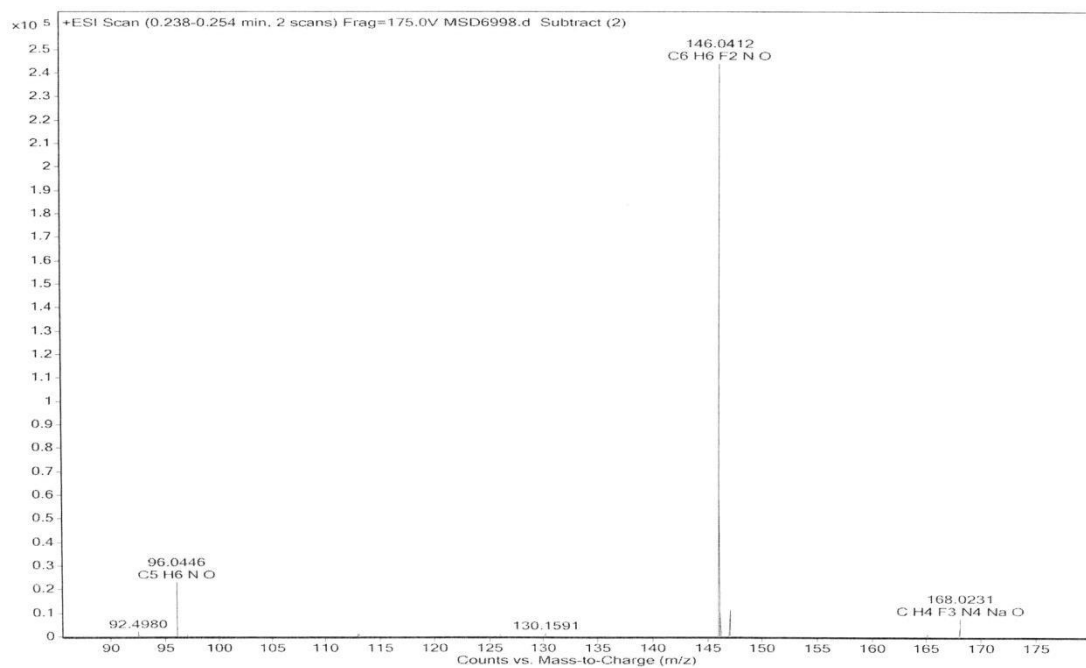

**Figure S33.** HR ESI-MS spectrum of compound **10b**.



# Compound 11a

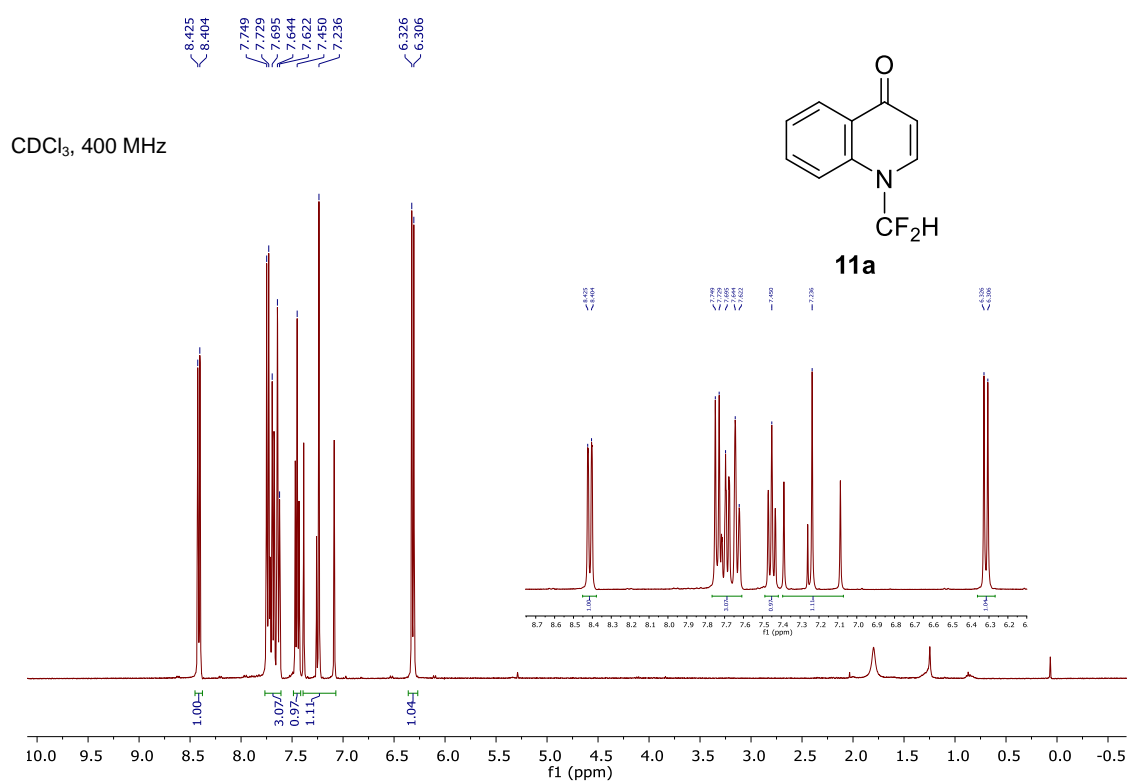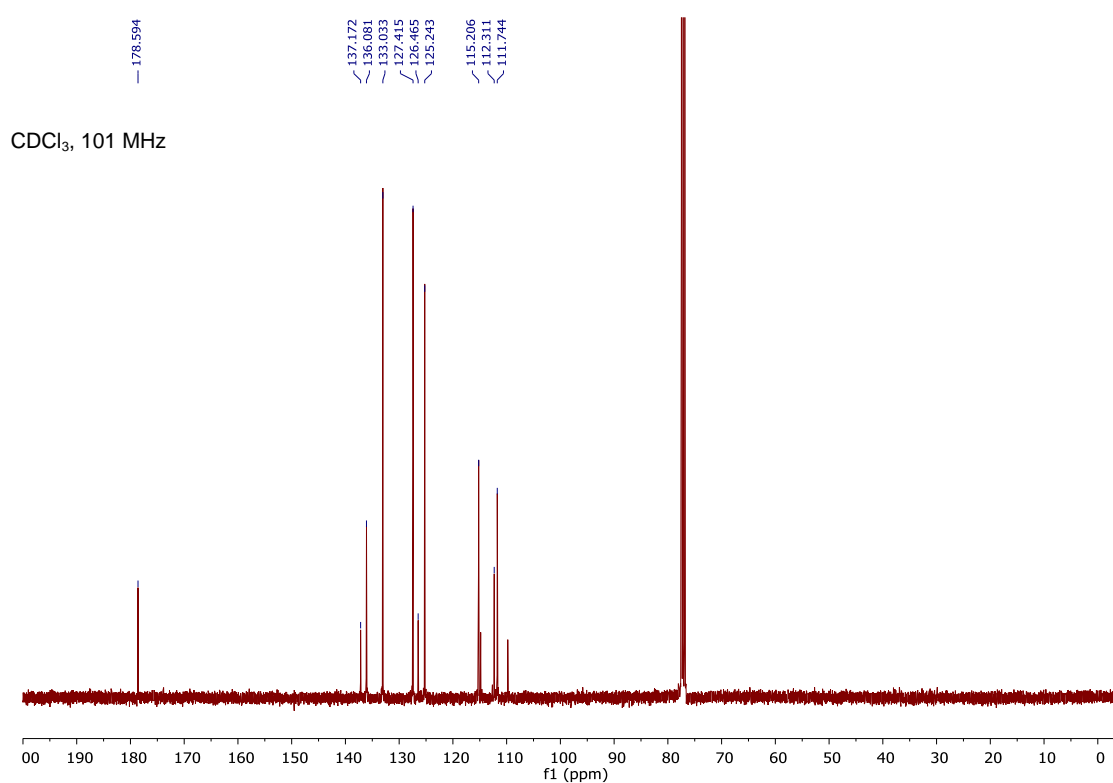

Figure S34. <sup>1</sup>H and <sup>13</sup>C NMR spectra of compound **11a** in CDCl<sub>3</sub>.

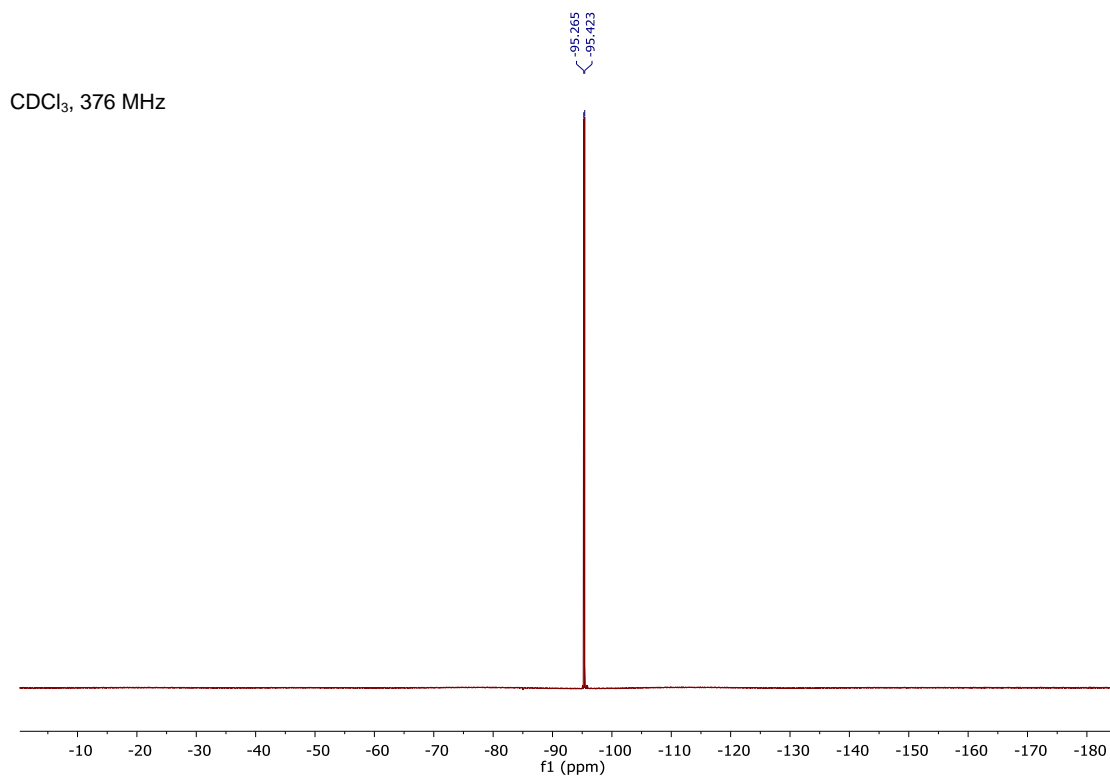

**Figure S35.** <sup>19</sup>F NMR spectra of compound **11a** in CDCl<sub>3</sub>.

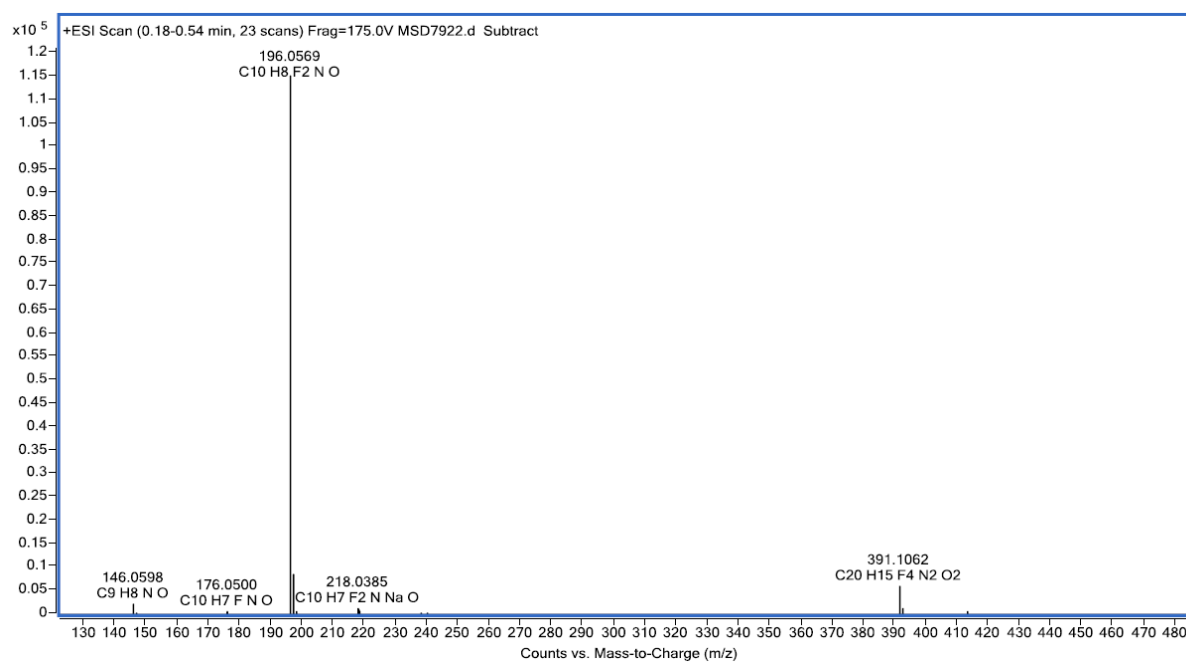

**Figure S36.** HR ESI-MS spectrum of compound **11a**.
